# Supplementary material for: Hairy CRISPR: Genome Editing in Plants Using Hairy Root Transformation
Source: MDPI journal article supplement (doi:10.3390/plants11010051), 2021-12-24
Supplement: s1 [file s1]

## Supplementary Materials

# Hairy CRISPR: Genome Editing in Plants Using Hairy Root Transformation

Alexey S. Kiryushkin, Elena L. Ilina, Elizaveta D. Guseva, Katharina Pawlowski and Kirill N. Demchenko

**Table S1.** List of Agrobacterium strains and CRISPR/Cas vector components from studies using hairy root transformation

| Plant species                                      | Reference | Year | Agrobacterium strain | Vector name or type of cloning system  | Promoters for gRNA expression | Promoters for Cas9 expression | Cas9 type                                                                      | Gene chosen for genome editing (name or ID)                                              | Marker of transgenic hairy roots |
|----------------------------------------------------|-----------|------|----------------------|----------------------------------------|-------------------------------|-------------------------------|--------------------------------------------------------------------------------|------------------------------------------------------------------------------------------|----------------------------------|
| <i>Arachis hypogaea</i> (peanut)                   | [1]       | 2019 | K599                 | p201B/Cas9<br>pUC-gRNA [2]             | pMtU6.6                       | 2xp35S                        | hCas9                                                                          | <i>ahFAD2a</i>                                                                           | Bar                              |
|                                                    | [3]       | 2020 |                      | p201G/Cas9<br>pUC-gRNA [2]             |                               |                               |                                                                                | <i>NFR1A1; A2; B1; B2; NFR5A; B</i>                                                      | EGFP                             |
| <i>Atropa belladonna</i> (belladonna)              | [4]       | 2021 | ATCC15834            | pMgP237-2A-GFP [5]                     | pAtU6-26                      | 2xp35SΩ                       | AtCas9 fused with GFP via P2A peptide                                          | <i>pyrrolidine ketide synthase (PYKS)</i>                                                | GFP; <b>Km<sup>PC</sup></b>      |
| <i>Brassica carinata</i> (Abyssinian mustard)      | [6]       | 2017 | C58 (pRiARqua1)*     | pB-CRISPR+35S::GFP (V112)              | pAtU6-26                      | pPcUbi4-2                     | hCas9 with translational enhancers from the Cowpea Mosaic Virus 5' and 3' UTRs | <i>FASCICLIN-LIKE ARABINOGALACTAN PROTEIN 1</i>                                          | <b>3xGFP</b> ; PPT               |
| <i>Brassica napus</i> (rapeseed)                   | [7]       | 2020 | AR15834              | pGWB401 based vectors                  | pAtU6                         | p35S                          | BnCas9                                                                         | <i>HVA22 homologue C; AGO1(miR168); TAO1(miR1885a)</i>                                   | Km                               |
| <i>Catharanthus roseus</i> (Madagascar periwinkle) | [8]       | 2021 | R1000* <sup>PC</sup> | MoClo system with custom modifications | pAtU6-26                      | pAtUbi10                      | izCas9                                                                         | <i>Jasmonate-associated MYC2; Jasmonate-associated MYC3; Repressor of MYC2 targets 1</i> | Hygr                             |
| <i>Cichorium intybus</i> (chicory)                 | [9]       | 2019 | 15834                | pYLCRISPR/Cas9 P35S-B [10]             | pCiU6-1                       | 2xp35S                        | pCas9                                                                          | <i>PDS</i>                                                                               | Bar                              |

| Plant species                           | Reference | Year | Agrobacterium strain | Vector name or type of cloning system                         | Promoters for gRNA expression | Promoters for Cas9 expression | Cas9 type | Gene chosen for genome editing (name or ID)                                                                                                                                                     | Marker of transgenic hairy roots                    |
|-----------------------------------------|-----------|------|----------------------|---------------------------------------------------------------|-------------------------------|-------------------------------|-----------|-------------------------------------------------------------------------------------------------------------------------------------------------------------------------------------------------|-----------------------------------------------------|
| <i>Eucalyptus grandis</i> (flooded gum) | [11]      | 2020 | A4RS                 | GoldenGate cloning system with custom components              | pAtU6                         | 2xp35S                        | hCas9     | <i>Cinnamoyl-CoA reductase1</i> ; IAA9A                                                                                                                                                         | DsRed                                               |
|                                         | [12]      |      |                      | custom vector                                                 | pAtU6                         | pZmUbi                        | dpCas9    | <i>bar</i> gene in <i>bar</i> soybean line; <i>GmFEI1</i> ; <i>GmFEI2</i> ; <i>GmSHR</i>                                                                                                        | GFP                                                 |
|                                         | [2]       | 2015 | K599                 | p201N/Cas9 pUC-gRNA [2]                                       | pMtU6.6                       | 2xp35S                        | hCas9     | <i>gfp</i> gene in <i>gfp</i> soybean line; <i>Glyma07g14530</i> ; <i>01gDDM1</i> ; <i>11gDDM1</i> ; <i>miR1509</i> ; <i>miR1514</i> ; <i>Glyma04g36150</i> (MET1); <i>Glyma06g18790</i> (MET1) | Km                                                  |
|                                         | [13]      |      | ARqua1*              | pMDC32/GUS/ GmCas9                                            | pAtU6-26                      | 2xp35S                        | GmCas9    | <i>glutamine synthase 1</i> ; <i>chalcone-flavanone isomerase 20</i>                                                                                                                            | <u>GUS</u> ; Hygr                                   |
| <i>Glycine max</i> (soybean)            | [14]      |      |                      | pCAMBIA3301 based vectors                                     | pAtU6-26; pGmU6-10            | p35S                          | pCas9     | <i>Glyma06g14180</i> ; <i>Glyma08g02290</i> ; <i>Glyma12g37050</i>                                                                                                                              | Blp                                                 |
|                                         | [15]      | 2016 | K599                 | Cas9/sgRNA plasmid construction kit (VIEWSOLID Biotechnology) | pAtU6                         | pZmUbi                        | dpCas9    | <i>PDS</i>                                                                                                                                                                                      | Bar                                                 |
|                                         | [16]      |      |                      | custom modified pHSE401 [17]                                  | pAtU6-26                      | 2xp35S                        | zCas9     | <i>Glyma.01G165800</i> ; <i>Glyma.01G165800-D</i>                                                                                                                                               | <u>GUS</u> ; Hygr                                   |
|                                         | [18]      | 2017 |                      | pHSE401 [17]                                                  | pAtU6-26                      | 2xp35S                        | zCas9     | <i>Rg1</i>                                                                                                                                                                                      | Hygr; <u>visual detection for nodules formation</u> |

| Plant species                | Reference | Year                      | Agrobacterium strain | Vector name or type of cloning system     | Promoters for gRNA expression     | Promoters for Cas9 expression | Cas9 type                                        | Gene chosen for genome editing (name or ID)                                                                                                                                                                                    | Marker of transgenic hairy roots                                       |     |
|------------------------------|-----------|---------------------------|----------------------|-------------------------------------------|-----------------------------------|-------------------------------|--------------------------------------------------|--------------------------------------------------------------------------------------------------------------------------------------------------------------------------------------------------------------------------------|------------------------------------------------------------------------|-----|
| <i>Glycine max</i> (soybean) | [19]      | 2018                      | K599                 | pCAMBIA3301 based vectors                 | pGmU6                             | p35S                          | pCas9                                            | <i>GmMYB118</i>                                                                                                                                                                                                                | Blp                                                                    |     |
|                              | [20]      |                           |                      | custom modified pKSE401 [17]              | pAtU6-26; pAtU6-29                | 2xp35S                        | zCas9                                            | <i>Nod Factor Receptor 1a</i>                                                                                                                                                                                                  | GFP; Km                                                                |     |
|                              | [21]      | 2019                      |                      | pYLCRISPR/Cas9 P35s-B [10]                | pAtU3b; pAtU3d; pAtU6-26; pAtU6-1 | 2xp35S                        | pCas9                                            | LATE ELONGATED HYPOCOTYL 1a; 1b; 2a; 2b                                                                                                                                                                                        | Bar                                                                    |     |
|                              | [22]      |                           |                      | pFGC5941                                  | pAtU6-26                          | 2xp35S                        | hCas9                                            | <i>GmFAD2-1A</i> ; <i>GmFAD2-1B</i>                                                                                                                                                                                            | Bar; <b>PCR</b>                                                        |     |
|                              | [23]      |                           |                      | pZG23C05 (ZGene Biotechnology Inc.)       | pAtU6                             | pUbi                          | dpCas9                                           | <i>Glyma.03g163500</i> ; <i>Glyma.10g037100</i> ; <i>Glyma.10g246300</i> ; <i>Glyma.13g123500</i> ; <i>Glyma.19g164800</i> ; <i>Glyma.19g164900</i> ; <i>Glyma.20g146200</i> ; <i>Glyma.20g148200</i> ; <i>Glyma.20g148400</i> | Bar                                                                    |     |
|                              | [24]      |                           |                      | pRI201-AN (TaKaRa Bio)                    | pGmU6                             | p35S                          | GmCas9 with AtADH 5'UTR                          | <i>Isoflavonoid syntase</i>                                                                                                                                                                                                    | Bar                                                                    |     |
|                              | [25]      |                           |                      | custom modified pCAMBIA1300 based vectors | pGmU6                             | pM4                           | Cas9                                             | 74 nodulation genes; 27 seed genes                                                                                                                                                                                             | Bar                                                                    |     |
|                              | [26]      |                           |                      | custom modified pHSE401 [17]              | pAtU6-26                          | 2xp35S                        | zCas9                                            | <i>Rg1</i>                                                                                                                                                                                                                     | AtMYB75/PAP1                                                           |     |
|                              | [27]      |                           |                      | 2020                                      | HBT-pcoCas9 [28] pBlu-gRNA [13]   | pAtU6-26                      | 2xp35S                                           | pCas9                                                                                                                                                                                                                          | <i>galactinol synthase</i> (GOLS) genes: <i>GOLS1A</i> ; <i>GOLS1B</i> | Bar |
|                              | [29]      |                           |                      | pHairyRed [30]                            | pGmU6                             | p35S                          | pCas9                                            | <i>GmPHR1</i> ; <i>GmPHR4</i>                                                                                                                                                                                                  | Hygr; <b>DsRed2</b>                                                    |     |
|                              | [31]      | Tri-KO1, Tri-KO2, Tri-KO3 |                      | pGmU3; pGmU6                              | pGmUbi3                           | dpCas9                        | <i>GmF3H1</i> ; <i>GmF3H2</i> ; <i>GmFNSII-1</i> | Bar                                                                                                                                                                                                                            |                                                                        |     |

| Plant species                | Reference | Year | Agrobacterium strain | Vector name or type of cloning system     | Promoters for gRNA expression                         | Promoters for Cas9 expression | Cas9 type                            | Gene chosen for genome editing (name or ID)                                                                                               | Marker of transgenic hairy roots |
|------------------------------|-----------|------|----------------------|-------------------------------------------|-------------------------------------------------------|-------------------------------|--------------------------------------|-------------------------------------------------------------------------------------------------------------------------------------------|----------------------------------|
| <i>Glycine max</i> (soybean) | [32]      |      |                      | custom modified pCAMBIA3300 based vectors | pAtU6-26; pAtU3b1; pAtU6-1; pAtU3d; pAtU6-29; pAtU3b2 | 2xp35S                        | Cas9                                 | <i>GmAGO7a; b</i>                                                                                                                         | <b>Bar; EGFP</b>                 |
|                              | [33]      |      | ARqua1*              | p201G/Cas9; pUC-gRNA [2]                  | pMtU6.6                                               | 2xp35S                        | hCas9                                | <i>Glyma15G191200</i>                                                                                                                     | EGFP                             |
|                              | [34]      |      |                      | p201-EGFP-C9                              | pGmUbi3; pMtU6                                        | pGmUbi3                       | hCas9                                | <i>GmIPK1; GmIPK2</i>                                                                                                                     | EGFP                             |
|                              | [35]      |      |                      | pFGC5941                                  | pU6                                                   | p35S                          | Cas9                                 | <i>Glyma06g14180</i>                                                                                                                      | Bar; <b>GUS/GFP</b>              |
|                              | [36]      |      |                      | p201G/Cas9; pUC-gRNA [2]                  | pMtU6.6                                               | 2xp35S                        | hCas9                                | <i>WI12<sup>Rhg1</sup>; DELLA11 and 18 FAD2-A (Glyma10g42470); MCT (Glyma10G276600); RPL15 (Glyma10G273900); PDCD6IP (Glyma10G266600)</i> | EGFP                             |
|                              | [37]      |      |                      | pFGC5941                                  | pGmU6                                                 | pGmUbi; p35S                  | LbCpf1; ttLbCpf1                     | <i>(Glyma10G276600); RPL15 (Glyma10G273900); PDCD6IP (Glyma10G266600)</i>                                                                 | Bar                              |
|                              | [38]      | 2021 | K599                 | pCAMBIA3301 based vectors                 | pGmU6-10                                              | p35S                          | pCas9                                | <i>GmNAC06</i>                                                                                                                            | Blp                              |
|                              | [39]      |      |                      | GoldenGate GATEWAY                        | p35S                                                  | p35S                          | Cas9 fused with Csy4 via P2A peptide | GW2                                                                                                                                       | Bar                              |
|                              | [40]      |      |                      | pCAMBIA3301 based vectors                 | pGmU6                                                 | p35S                          | pCas9                                | <i>GmCRY1a-1d; 2a-2b</i>                                                                                                                  | Blp                              |
|                              | [41]      |      |                      | pCAMBIA3301 based vector <sup>PC</sup>    | pGmU6-6 <sup>PC</sup>                                 | 2xp35S <sup>PC</sup>          | Cas9 <sup>PC</sup>                   | <i>lncRNA77580</i>                                                                                                                        | Blp                              |
|                              | [42]      |      |                      | pBSE401 [17]                              | pAtU6-26; pAtU6-29                                    | p35S                          | zCas9                                | <i>GmNHX5</i>                                                                                                                             | Blp; <b>PCR</b>                  |
|                              | [43]      |      |                      | not reported                              | not reported                                          | not reported                  | Cas9                                 | <i>galactinol synthase genes (G03 and 19)</i>                                                                                             | Bar                              |
|                              | [44]      |      |                      | pCAMBIA3301 based vectors                 | pAtU6-26; pGmU6-10                                    | p35S                          | Cas9                                 | <i>GmpPLA-IIε; GmpPLA-IIζ</i>                                                                                                             | Blp; <b>PCR</b>                  |

| Plant species                                      | Reference | Year | Agrobacterium strain | Vector name or type of cloning system           | Promoters for gRNA expression | Promoters for Cas9 expression | Cas9 type                                   | Gene chosen for genome editing (name or ID)                                                                                  | Marker of transgenic hairy roots |
|----------------------------------------------------|-----------|------|----------------------|-------------------------------------------------|-------------------------------|-------------------------------|---------------------------------------------|------------------------------------------------------------------------------------------------------------------------------|----------------------------------|
|                                                    | [45]      |      |                      | JRH0951 (gRNA);<br>JRHO945 (Cas9)               | pGmU6-10                      | 2xp35S                        | Cas9                                        | <i>GmCONSTANS</i>                                                                                                            | Bar                              |
|                                                    | [46]      |      |                      | custom modified<br>pCAMBIA1300<br>based vectors | pGmU6                         | pM4                           | Cas9                                        | <i>miR169c</i>                                                                                                               | Bar                              |
|                                                    | [47]      |      |                      | pSoy10                                          | not reported                  | not reported                  | Cas9                                        | <i>GmDDR1</i>                                                                                                                | DsRed2                           |
| <i>Glycine soja</i><br>(wild soybean)              | [48]      | 2020 | K599                 | pCAMBIA3301 based<br>vectors                    | pGmU6-10                      | p35S                          | Cas9                                        | <i>SOS1</i> (plasma<br>membrane Na <sup>+</sup> /H <sup>+</sup><br>antiporter);<br>nonselective<br>cation channels<br>(NSCC) | Blp                              |
| <i>Glycyrrhiza glabra</i><br>(licorice)            | [49]      | 2021 | ATCC15834            | pHSE401 [17]                                    | pAtU6-26                      | 2xp35S                        | zCas9                                       | <i>F5H</i>                                                                                                                   | Hygr                             |
| <i>Glycyrrhiza uralensis</i><br>(Chinese licorice) | [50]      | 2021 | ATCC15834            | pHSE401 [17]                                    | pAtU6-26                      | 2xp35S                        | zCas9                                       | $\beta$ -AS                                                                                                                  | Hygr                             |
| <i>Gossypium hirsutum</i><br>(cotton)              | [51]      | 2021 | K599                 | custom modified<br>pCAMBIA2301                  | pAtU6-26                      | 2xp35S                        | Cas9                                        | <i>GhMYB25-like A</i><br>and <i>D</i>                                                                                        | Km                               |
|                                                    | [52]      | 2016 | LBA1334*             | custom modified<br>pCAMBIA1300                  | pLjU6-1                       | 2xp35S; pLjLb2                | Cas9                                        | <i>Leghemoglobins</i><br>(Lb) <i>b1</i> ; <i>b2</i> and <i>b3</i>                                                            | sGFP                             |
| <i>Lotus japonicus</i>                             | [53]      | 2019 | ATCC15834            | pMgP237-2A-GFP [5]                              | pAtU6-26                      | 2xp35S $\Omega$               | AtCas9 fused with<br>GFP via T2A<br>peptide | <i>CYP716A51</i>                                                                                                             | <b>GFP</b> ; Km                  |
|                                                    | [54,55]   | 2020 |                      | pCas9::ALMT-<br>sgRNA1/2                        |                               |                               |                                             | <i>LaALMT1</i> ((Al)-<br>activated malate<br>transporter 1)                                                                  |                                  |
| <i>Lupinus albus</i><br>(white lupin)              | [54,56]   | 2021 | A4T                  | pCas9::MATEPS1;<br>pCas9::MATEPS2               | pAtU6-6 <sup>PC</sup>         | pPcUbi4-2 <sup>PC</sup>       | pCas9                                       | <i>LaMATE</i> ;<br><i>LaMATE3</i><br>(Multidrug and<br>Toxic Compound<br>Extrusion)                                          | Bar; <b>GFP</b>                  |
| <i>Medicago truncatula</i>                         | [13]      | 2015 | ARqua1*              | pMDC32/GmCas9                                   | pAtU6-26                      | 2xp35S                        | GmCas9                                      | <i>GUS</i> gene in <i>GUS</i><br>barrelclover line                                                                           | Hygr                             |

| Plant species                                       | Reference    | Year | Agrobacterium strain | Vector name or type of cloning system | Promoters for gRNA expression | Promoters for Cas9 expression | Cas9 type                                                                   | Gene chosen for genome editing (name or ID)                                                     | Marker of transgenic hairy roots |
|-----------------------------------------------------|--------------|------|----------------------|---------------------------------------|-------------------------------|-------------------------------|-----------------------------------------------------------------------------|-------------------------------------------------------------------------------------------------|----------------------------------|
|                                                     | [57]         | 2017 |                      | custom modified pKSE401 [17]          | pAtU6-26                      | 2xp35S                        | zCas9                                                                       | <i>DZA315(Fix<sup>+</sup>) allele of Medtr8g465280 (NFS2)</i>                                   | <b>GUS</b> ; Km                  |
|                                                     | [58]<br>[59] | 2018 |                      |                                       |                               |                               |                                                                             | <i>NCR-<math>\alpha</math>; NCR-<math>\beta</math> NFS<sup>1</sup>; NFS<sup>2</sup> alleles</i> |                                  |
|                                                     | [60]         | 2020 | LBA9402              | pYLCRISPR/Cas9 P35s-B [10]            | pAtU3b                        | 2xp35S                        | pCas9 with highest GC content at the 5' terminal region for Gramineae genes | <i>PDS</i>                                                                                      | Bar                              |
| <i>Medicago truncatula</i>                          | [61]         | 2020 | ARqua1*              | pHSN401 [17]                          | pAtU6-26; pMtU6-1             | 2xp35S                        | zCas9                                                                       | <i>MtCRA2; MtEIN2</i>                                                                           | Hygr                             |
| <i>Nicotiana tabacum</i> (tobacco)                  | [62]         | 2020 | ATCC15834            | GoldenBraid 4.0                       | <i>snoRNA</i> promoters       | p35S                          | hCas9                                                                       | <i>N-methylputrescine oxidase (MPO) gene family</i>                                             | <b>Km</b> ; <b>DsRed</b>         |
| <i>Ophiorrhiza pumila</i>                           | [63]         | 2020 | C58C1*               | pCAMBIA1300 based vectors             | pAtU6                         | pAtUbi                        | hCas9                                                                       | <i>secologanin synthetase; geraniol-10-hydroxylase</i>                                          | Hygr                             |
| <i>Phtheirospermum japonicum</i>                    | [64]         | 2021 | AR1193*              | GoldenGate                            | pAtU6                         | 2xp35S                        | hCas9                                                                       | <i>PjIPT1a</i>                                                                                  | DsRed                            |
| <i>Populus tremula</i> x <i>alba</i> (hybrid polar) | [65]         | 2020 | ARqua1*              | p201G/Cas9; pUC-gRNA [2]              | pMtU6.6                       | 2xp35S                        | hCas9                                                                       | <i>UDP-dependent glycosyltransferases (UGT71L1, UGT78M1)</i>                                    | EGFP                             |
|                                                     | [66]         | 2021 |                      | MoClo system                          | pAtU6-26; pAtU6-29            | pAtAct2                       | Cas9                                                                        | <i>SHORTROOT; YUC4; PLETHORA1; LBD4; LBD12</i>                                                  | tdTomato                         |
| <i>Punica granatum</i> (pomegranate)                | [67]         | 2019 | MSU440*              | custom modified pCAMBIA1300           | pAtU6                         | pAtUbi1                       | Cas9                                                                        | <i>UDP-dependent glycosyltransferases (UDP84A23; UDP84A24)</i>                                  | GFP                              |
| <i>Salvia miltiorrhiza</i> (red sage)               | [68]         | 2017 | ACCC10060            | pCAMBIA1300 based vectors             | pAtU6-26                      | 2xp35S                        | Cas9                                                                        | <i>committed diterpene synthase 1</i>                                                           | Hygr                             |

| Plant species                        | Reference    | Year | Agrobacterium strain | Vector name or type of cloning system                                       | Promoters for gRNA expression | Promoters for Cas9 expression | Cas9 type                                                           | Gene chosen for genome editing (name or ID)                                            | Marker of transgenic hairy roots |
|--------------------------------------|--------------|------|----------------------|-----------------------------------------------------------------------------|-------------------------------|-------------------------------|---------------------------------------------------------------------|----------------------------------------------------------------------------------------|----------------------------------|
|                                      | [69]         | 2018 | C58C1*               |                                                                             | pAtU6-26; pOsU3               | pAtUbi; pOsUbi                | hCas9                                                               | <i>rosmarinic acid synthase</i>                                                        |                                  |
|                                      | [70]<br>[71] | 2020 | C58C1 (pRiA4)*       |                                                                             | pAtU6                         | pAtUbi                        | hCas9                                                               | <i>bZIP1</i><br><i>MYB98</i>                                                           |                                  |
|                                      | [72]         |      | ATCC15834            | pICSL002218A (TSL SynBio, Norwich, UK)                                      | pAtU6-26 <sup>PC</sup>        | pAtUbi10 <sup>PC</sup>        | hCas9 <sup>PC</sup>                                                 | <i>SmKFB5</i>                                                                          | <b>Km; PCR</b> <sup>PC</sup>     |
|                                      | [73]         | 2021 | C58C1*               | pCAMBIA1300 based vectors                                                   | pAtU6                         | pAtUbi                        | Cas9                                                                | 23 LACCASE genes (1-4; 8-13; 15-24; 26-28)                                             | Hygr                             |
| <i>Solanum lycopersicum</i> (tomato) | [74]         | 2014 | ATCC15834            | pMR093                                                                      | pAtU6                         | p35S                          | <i>Nicotiana</i> sp. codon optimized Cas9                           | <i>GFP</i> and <i>SHR</i> genes in <i>SISCRpro:modified (m) mGFP5</i> tomato line      | BASTA                            |
|                                      | [75]         | 2016 | ARqua1*              | p201N/Cas9 pUC-gRNA [2]                                                     | pMtU6.6                       | 2xp35S                        | hCas9                                                               | no genes were reported                                                                 | Km                               |
| <i>Solanum lycopersicum</i> (tomato) | [76]         | 2019 | ATCC15834            | pMgP237-2A-GFP [5]                                                          | pAtU6-26                      | 2xp35SΩ                       | AtCas9 fused with GFP via T2A peptide                               | <i>Sl5αR1</i> ; R2                                                                     | GFP; Km; <b>PCR</b>              |
|                                      | [77]         | 2020 | ATCC15834            | GoldenGate; pDe-Cas9(VQR)-Km; pDe-Cas9-Km                                   | pAtU6                         | pPcUbi4-2                     | Cas9; Cas9(VQR)                                                     | <i>MYC1</i> ; <i>MYC2</i> ; <i>COI1</i> ; <i>C5-SD2</i>                                | Km                               |
|                                      | [5]          | 2018 | ATCC15834            | pEgP237-2A-GFP [78]                                                         | pAtU6-26                      | 2xp35SΩ                       | AtCas9 fused with GFP via T2A peptide                               | <i>St16DOX</i> (2-oxoglutarate-dependent dioxygenase)                                  | GFP; Km; <b>PCR</b>              |
| <i>Solanum tuberosum</i> (potato)    | [79]         |      | MSU440*              | GoldenGate cloning system and vectors developed by Čermák et al., 2017 [80] | pAtU6; pAt7SL                 | p35S                          | AtCas9; AtCas9 or AtCas9D10A both fused with dpCsy4 via P2A peptide | <i>PDS</i>                                                                             | Hygr                             |
|                                      | [81]         | 2020 | 15834 or 43056*      | pBIN-HcoCas9: mGFP; pChimera (for gRNA construction)                        | pAtU6-26                      | 2xp35S                        | hCas9                                                               | <i>GFP</i> gene in <i>GFP</i> potato line; <i>nonexpresser of pathogenesis-related</i> | mGFP                             |

3

| Plant species                                  | Reference | Year | Agrobacterium strain | Vector name or type of cloning system            | Promoters for gRNA expression | Promoters for Cas9 expression | Cas9 type | Gene chosen for genome editing (name or ID) | Marker of transgenic hairy roots |
|------------------------------------------------|-----------|------|----------------------|--------------------------------------------------|-------------------------------|-------------------------------|-----------|---------------------------------------------|----------------------------------|
| <i>Symphytum officinale</i> (comfrey)          | [82]      | 2021 | ATCC15834            | pEn-Chimera (for sgRNA); modified pDe-Cas9 [83]  | pAtU6-26                      | pPcUbi4-2                     | AtCas9    | homospermidine synthase                     | Hygr                             |
| <i>Taraxacum kok-saghyz</i> (rubber dandelion) | [84]      | 2016 | K599                 | pFGC-pcoCas9 (AG # 52256); pICH86966 (gRNA) [85] | pAtU6                         | p35SPPDK                      | pCas9     | fructan:fructan 1-fructosyltransferase      | BASTA; <u>PCR</u>                |
| <i>Vigna unguiculata</i> (cowpea)              | [86]      | 2019 | K599                 | custom modified pCAMBIA1300                      | pLjU6-1                       | 2xp35S                        | Cas9      | VuSYM RK                                    | sGFP                             |

**Agrobacterium strains:** \* — *Agrobacterium rhizogenes* strains with the chromosomal background of *Agrobacterium tumefaciens* C58.

**Cas9 types:** **AtCas9** — Arabidopsis codon optimized Cas9; **AtCas9D10A** — Arabidopsis codon optimized nickase Cas9D10A; **BnCas9** — rapeseed codon optimized Cas9; **Cas9(VQR)** — mutant Cas9 recognizing the 5′—NGA—3′ protospacer adjacent motif (PAM) instead of the 5′—NGG—3′ PAM; **dpCas9** — Cas9 codon optimized for dicots; **GmCas9** — soybean codon optimized Cas9; **hCas9** — human codon optimized Cas9; **Cpf1** — Cas nuclease from CRISPR system of *Prevotella* and *Francisella* 1 (also known as Cas12); **LbCpf1** — Cpf1 nuclease of *Lachnospiraceae* bacterium (recognizing the 5′—TTTN—3′ PAM instead of the NGG PAM); **ttLbCpf1** — temperature-tolerant LbCpf1 variant; **pCas9** — plant codon optimized Cas9; **zCas9** — maize codon optimized Cas9; **izCas9** — zCas9 with multiple introns.

**Promoters:** **pAct2** — promoter of the *actin2* gene; **pLb** — leghemoglobin promoter; **p35S** — 35S promoter from the Cauliflower Mosaic Virus; **2xp35S** — double p35S; **2xp35SΩ** — 2xp35S with the omega translational enhancer from the Cauliflower Mosaic Virus 5′ UnTranslated Region (5′-UTR); **p35SPPDK** — constitutive 35S enhancer fused to the maize C4 pyruvate orthophosphate dikinase (C4PPDK) basal promoter; **pM4** — promoter of the soybean *SCREAM M4* gene; **pUbi** — promoter of a *ubiquitin* gene; **pU6**, **pU3** or **p7SL** — promoters of the small nucleolar RNA (*snoRNA*) genes.

**Markers for transgenic hairy root detection:** **Bar** (synonyms **BASTA**, **Blp** or **PPT**) — gene encoding resistance to the phosphinothricin (PPT) or to the PPT-containing compounds (e.g. tripeptide bialaphos (Blp), herbicide BASTA®); **DsRed** — Red Fluorescent Protein from *Discosoma* sp.; **GFP** — green fluorescent protein from *Aequorea victoria* and its variants: **3xGFP** — triple GFP, **EGFP** — enhanced GFP, **mGFP** — monomeric GFP, **sGFP** — synthetic GFP; **GUS** — β-glucuronidase; **GUS/GFP** — bifunctional fusion between GUS and GFP; **Hygr** — hygromycin resistance; **Km** — kanamycin resistance; **MYB75/PAP1** — anthocyanin pigmentation screenable marker encoded by the MYELOBLASTOSIS75/PRODUCTION OF ANTHOCYANIN PIGMENTS1 (MYB75/PAP1) gene; **PCR** — genotyping by the polymerase chain reaction (PCR); **tdTOMATO** — tandem linked dimers of the Red Fluorescent Protein TOMATO (DsRed1 derivative). If more than one selectable/screenable marker was present in the CRISPR/Cas9 plasmid, the marker preferred by investigators is listed in underlined bold print.

**Species abbreviations:** **At** — *Arabidopsis thaliana*; **Ci** — *Cichorium intybus*; **Gm** — *Glycine max*; **La** — *Lupinus albus*; **Lj** — *Lotus japonicus*; **Mt** — *Medicago truncatula*; **Os** — *Oryza sativa*; **Pc** — *Petroselinum crispum*; **Sl** — *Solanum lycopersicum*; **Zm** — *Zea mays*.

**Other vector components and abbreviations:** **ADH** — translational enhancer from the 5′-UTR of the *alcohol dehydrogenase* gene; **AG** — AddGene (plasmid repository); **Csy4** — RNA endonuclease Csy4 from *Pseudomonas aeruginosa*; **dpCsy4** — dicots codon optimized Csy4; **PC** — personal communication (used when the information about *A. rhizogenes* strain or vector components was not found in a published study, either in the main text or in the supplementary materials; PC was used for refs 4, 8, 39; 49–51, 67); **P2A** — self cleaving 2A peptide from porcine teschovirus-1 (PTV); **T2A** — self cleaving 2A peptide from *Thosea assigna* virus (TaV).



**Table S2.** Examples of the old-known conventional and nonconventional markers used for identification of transgenicity in transformed plants

| Year of the first report about marker usage for identification of transgenicity | Reference | Plant species chosen for testing the marker                                         | Common name of marker | Type of marker                                                                                                    | Protein                                                                                        | Source of marker (including year and reference)                                                                           |
|---------------------------------------------------------------------------------|-----------|-------------------------------------------------------------------------------------|-----------------------|-------------------------------------------------------------------------------------------------------------------|------------------------------------------------------------------------------------------------|---------------------------------------------------------------------------------------------------------------------------|
| 1983                                                                            | [87]      | <i>Nicotiana tabacum</i>                                                            | Neo/Km                | antibiotic resistance (selectable)                                                                                | neomycin phosphotransferase II (NPTII) or aminoglycoside 3-phosphotransferase II (APH (3')-II) | <i>nptII</i> gene from the Tn5 transposon (1982) [88]                                                                     |
|                                                                                 |           |                                                                                     | Mtx                   |                                                                                                                   | methotrexate-insensitive dihydrofolate reductase (DHFR)                                        | <i>dhfr</i> gene from the Tn7 transposon (1982) [89]                                                                      |
| 1985 (March)*                                                                   | [90]      | <i>Nicotiana tabacum</i>                                                            | Hygr                  | antibiotic resistance (selectable)                                                                                | hygromycin phosphotransferase (HPT)                                                            | <i>Escherichia coli aphIV</i> gene (1983) [91,92]                                                                         |
| 1985 (October)                                                                  | [93]      | <i>Nicotiana tabacum</i>                                                            | Glp                   | herbicide resistance (to N-phosphonomethylglycine (glyphosate) containing herbicides, e.g. Roundup®) (selectable) | 5-enolpyruvyl-shikimate 3-phosphate (EPSP) synthase                                            | <i>Salmonella tiphimurium</i> mutant allele of the <i>aroA</i> gene (1983) [94]                                           |
| 1986                                                                            | [95]      | <i>Nicotiana plumbaginifolia</i>                                                    | Bm                    | antibiotic resistance (selectable)                                                                                | glycopeptide interacting with DNA causes double strand breaks                                  | <i>ble</i> gene from the Tn5 transposon (1985) [96,97]                                                                    |
| 1987 (September)                                                                | [98]      | <i>Nicotiana tabacum</i><br><i>Solanum lycopersicum</i><br><i>Solanum tuberosum</i> | Bar (Blp; BASTA)      | herbicide resistance (to phosphinothricin (PPT) or bialaphos containing herbicides, e.g. BASTA®) (selectable)     | phosphinothricin N-acetyltransferase (PAT)                                                     | <i>Streptomyces hygroscopicus bar</i> gene conferring resistance to bialaphos (the tripeptide containing PPT) (1986) [99] |
| 1987 (November)                                                                 | [100]     | <i>Nicotiana tabacum</i><br><i>Nicotiana plumbaginifolia</i>                        | Str (Sm)              | antibiotic resistance (selectable)                                                                                | streptomycin phosphotransferase (SPT)                                                          | <i>spt</i> gene from the Tn5 transposon (1983/85) [97,101]                                                                |
| 1988 (February)                                                                 | [102]     | <i>Arabidopsis thaliana</i>                                                         | ALS                   | herbicide resistance (to the sulfonylureas, e.g. chlorsulfuron) (selectable)                                      | acetolactate synthase (ALS)                                                                    | <i>als</i> gene from the chlorsulfuron resistant <i>Arabidopsis thaliana</i> mutant (1988) [102]                          |
| 1988 (April)                                                                    | [103]     | <i>Arabidopsis thaliana</i><br><i>Petunia hybrida</i>                               | Gm/Neo/Km             | antibiotic resistance (selectable)                                                                                | aminoglycoside-3-N-acetyl transferases AAC(3)-III and IV                                       | <i>aacC3</i> and <i>C4</i> genes from the IS140 mobile element (1984/85) [104,105]                                        |

| Year of the first report about marker usage for identification of transgenicity | Reference | Plant species chosen for testing the marker                                         | Common name of marker    | Type of marker                                                       | Protein                                                          | Source of marker (including year and reference)                                                                                      |
|---------------------------------------------------------------------------------|-----------|-------------------------------------------------------------------------------------|--------------------------|----------------------------------------------------------------------|------------------------------------------------------------------|--------------------------------------------------------------------------------------------------------------------------------------|
| 1988 (May)                                                                      | [106]     | <i>Zea mays</i>                                                                     | GUS                      | colorimetric (screenable)                                            | $\beta$ -glucuronidase                                           | <i>Escherichia coli uidA</i> gene (1973/86) [107,108]                                                                                |
| 1989 (August)                                                                   | [109]     | <i>Nicotiana tabacum</i>                                                            | 2,4-D                    | 2,4-dichlorophenoxyacetate (synthetic auxin) resistance (selectable) | 2,4-dichlorophenoxyacetate monooxygenase (DPAM)                  | the soil bacterium <i>Alcaligenes eutrophus tfdA</i> gene (1987) [110]                                                               |
| 1989 (October)                                                                  | [111]     | <i>Nicotiana tabacum</i>                                                            | Pm/Bm                    | antibiotic resistance (selectable)                                   | glycopeptide interacting with DNA causes double strand breaks    | <i>ble</i> gene from the Tn3 transposon (1985) [96,97]; the actinomycete <i>Streptoalloteichus hindustanus ble</i> gene (1990) [112] |
| 1990 (January)                                                                  | [113]     | <i>Zea mays</i>                                                                     | anthocyanin pigmentation | colorimetric (screenable)                                            | transcription factor of the basic Helix-Loop-Helix (bHLH) family | <i>Zea mays Leaf color</i> gene ( <i>ZmLc</i> ) ( <i>bHLH</i> ) (1989) [114]                                                         |
| 1990 (February)                                                                 | [115]     | <i>Nicotiana tabacum</i>                                                            | Str/Sp                   | antibiotic resistance (selectable)                                   | aminoglycoside-(3") (9)-adenylyltransferase ( <i>AadA</i> )      | <i>Escherichia coli aadA</i> gene (1985) [116]                                                                                       |
| 1990 (September)                                                                | [117]     | <i>Nicotiana tabacum</i>                                                            | Bsd                      | antibiotic resistance (selectable)                                   | blastidicin S deaminase ( <i>Bsd</i> ) (aminohydrolase)          | <i>Bacillus cereus bsr</i> gene (1987/88) [118,119]                                                                                  |
| 1991                                                                            | [120]     | <i>Nicotiana tabacum</i>                                                            | Gm                       | antibiotic resistance (selectable)                                   | aminoglycoside-3-N-acetyltransferase ( <i>AAC(3)-I</i> )         | <i>aacC1</i> gene from the Tn21-like transposon [121]                                                                                |
| 1995                                                                            | [122]     | <i>Citrus sinensis</i>                                                              | GFP                      | fluorescent protein (screenable)                                     | Green Fluorescent Protein                                        | <i>gfp10</i> template obtained from the native <i>gfp</i> of the jellyfish <i>Aequorea victoria</i> (1992) [123]                     |
| 1998 (April)                                                                    | [124]     | <i>Beta vulgaris</i>                                                                | ManA                     | selection for ability to metabolize mannose (selectable)             | phosphomannose isomerase ( <i>PMI</i> )                          | <i>Escherichia coli manA</i> gene (1984) [125]                                                                                       |
| 1998 (May)                                                                      | [126]     | <i>Nicotiana tabacum</i><br><i>Solanum lycopersicum</i><br><i>Solanum tuberosum</i> | XylA                     | selection for ability to metabolize xylose (selectable)              | xylose isomerase                                                 | <i>Clostridium thermosulfurogenes xylA</i> gene (1990) [127]                                                                         |
| 2001                                                                            | [128]     | <i>Nicotiana tabacum</i>                                                            | DsRed                    | fluorescent protein (screenable)                                     | Orange (Red) Fluorescent Protein                                 | <i>Discosoma</i> sp. <i>DsRed</i> gene (1999) [129]                                                                                  |

| Year of the first report about marker usage for identification of transgenicity | Reference | Plant species chosen for testing the marker | Common name of marker | Type of marker                                                                                  | Protein                              | Source of marker (including year and reference)           |
|---------------------------------------------------------------------------------|-----------|---------------------------------------------|-----------------------|-------------------------------------------------------------------------------------------------|--------------------------------------|-----------------------------------------------------------|
| 2004                                                                            | [130]     | <i>Arabidopsis thaliana</i>                 | TPS1                  | selection for insensitivity to the medium containing glucose in high concentration (selectable) | trehalose-6-phosphate synthase (TPS) | <i>Arabidopsis thaliana</i> <i>TPS1</i> gene (1998) [131] |

\*If two or more studies were published per same year, then studies were ranged by month of publication.

**Table S3.** List of research tasks solved using CRISPR/Cas editing of different genes in hairy roots.

| Plant species                                      | Reference | Year | Gene chosen for genome editing (name or ID)                                                                                                        | Method of hairy roots obtaining* | Aims of studies reporting only identification of genome editing events in hairy roots | Aims of studies using both identification of genome editing events and phenotyping of edited hairy roots |
|----------------------------------------------------|-----------|------|----------------------------------------------------------------------------------------------------------------------------------------------------|----------------------------------|---------------------------------------------------------------------------------------|----------------------------------------------------------------------------------------------------------|
| <i>Arachis hypogaea</i> (peanut)                   | [1]       | 2019 | <i>ahFAD2a</i>                                                                                                                                     | CP                               | testing of genome editing capability in hairy roots                                   |                                                                                                          |
|                                                    | [3]       | 2020 | <i>NFR1A1</i> ; <i>A2</i> ; <i>B1</i> ; <i>B2</i> ; <i>NFR5A</i> ; <i>B</i>                                                                        | CP                               |                                                                                       | root nodule (RN) symbiosis investigation (phenotyping for nodules formation)                             |
| <i>Atropa belladonna</i> (belladonna)              | [4]       | 2021 | <i>pyrrolidine ketide synthase (PYKS)</i>                                                                                                          | LE                               |                                                                                       | metabolic engineering (phenotyping for changes of tropane alkaloids)                                     |
| <i>Brassica carinata</i> (Abyssinian mustard)      | [6]       | 2017 | <i>FASCICLIN-LIKE ARABINOGALACTAN PROTEIN 1</i>                                                                                                    | CP                               |                                                                                       | root development (phenotyping for root hairs formation)                                                  |
| <i>Brassica napus</i> (rapeseed)                   | [7]       | 2020 | <i>HVA22</i> homologue <i>C</i> ; <i>AGO1</i> ( <i>miR168</i> ); <i>TAO1</i> ( <i>miR1885a</i> )                                                   | CE                               | testing of genome editing efficiency before stable transformation                     |                                                                                                          |
| <i>Catharanthus roseus</i> (Madagascar periwinkle) | [8]       | 2021 | <i>Jasmonate-associated MYC2</i> ; <i>Jasmonate-associated MYC3</i> ; <i>Repressor of MYC2 targets 1</i>                                           | SE                               | testing of genome editing capability in hairy roots                                   |                                                                                                          |
| <i>Cichorium intybus</i> (chicory)                 | [9]       | 2019 | <i>PDS</i>                                                                                                                                         | LE                               | regeneration to the whole genome edited plant                                         |                                                                                                          |
| <i>Eucalyptus grandis</i> (flodded gum)            | [11]      | 2020 | <i>Cinnamoyl-CoA reductase1</i> ; <i>IAA9A</i>                                                                                                     | CP                               |                                                                                       | root development (phenotyping for lignin biosynthesis)                                                   |
| <i>Glycine max</i> (soybean)                       | [12]      | 2015 | <i>bar</i> gene in <i>bar</i> soybean line; <i>GmFEI1</i> ; <i>GmFEI2</i> ; <i>GmSHR</i>                                                           | HE and CE                        | testing of genome editing capability in hairy roots                                   |                                                                                                          |
|                                                    | [2]       |      | <i>gfp</i> gene in <i>gfp</i> soybean line; <i>Glyma07g14530</i> ; <i>01gDDM1</i> ; <i>11gDDM1</i> ; <i>miR1509</i> ; <i>miR1514</i> ; <i>MET1</i> | HE and CE                        |                                                                                       |                                                                                                          |
| <i>Glycine max</i> (soybean)                       | [13]      | 2015 | <i>glutamine synthase 1</i> ; <i>chalcone-flavanone isomerase 20</i>                                                                               | CE                               | testing of genome editing capability in hairy roots                                   |                                                                                                          |
|                                                    | [14]      |      | <i>Glyma06g14180</i> ; <i>Glyma08g02290</i> ; <i>Glyma12g37050</i>                                                                                 | CP                               |                                                                                       |                                                                                                          |
|                                                    | [15]      | 2016 | <i>PDS</i>                                                                                                                                         | CE                               | testing of genome editing efficiency before stable transformation                     |                                                                                                          |

| Plant species | Reference                    | Year | Gene chosen for genome editing (name or ID)                                                                                                                    | Method of hairy roots obtaining*                        | Aims of studies reporting only identification of genome editing events in hairy roots | Aims of studies using both identification of genome editing events and phenotyping of edited hairy roots |                                                                  |
|---------------|------------------------------|------|----------------------------------------------------------------------------------------------------------------------------------------------------------------|---------------------------------------------------------|---------------------------------------------------------------------------------------|----------------------------------------------------------------------------------------------------------|------------------------------------------------------------------|
|               | [16]                         | 2017 | <i>Glyma.01G165800; Glyma.01G165800-D</i>                                                                                                                      | CP                                                      |                                                                                       | RN symbiosis investigation (phenotyping for nodules formation)                                           |                                                                  |
|               | [18]                         |      | <i>Rg1</i>                                                                                                                                                     | CP                                                      |                                                                                       | investigation of resistance to the abiotic stress conditions (phenotyping of sensitivity to the drought) |                                                                  |
|               | [19]                         | 2018 | <i>GmMYB118</i>                                                                                                                                                | CP                                                      |                                                                                       | RN symbiosis investigation (phenotyping for nodules formation)                                           |                                                                  |
|               | [20]                         |      | <i>Nod Factor Receptor 1a</i>                                                                                                                                  | CP                                                      |                                                                                       |                                                                                                          |                                                                  |
|               | [21]                         | 2019 | <i>LATE ELONGATED HYPOCOTYL 1a; 1b; 2a; 2b</i>                                                                                                                 | CP                                                      | testing of genome editing eviciency before stable transformation                      |                                                                                                          |                                                                  |
|               | [22]                         |      | <i>GmFAD2-1A; GmFAD2-1B</i>                                                                                                                                    | CP                                                      |                                                                                       |                                                                                                          |                                                                  |
|               | [23]                         |      | <i>Glyma.03g163500; Glyma.10g037100; Glyma.10g246300; Glyma.13g123500; Glyma.19g164800; Glyma.19g164900; Glyma.20g146200; Glyma.20g148200; Glyma.20g148400</i> | CP                                                      | testing of genome editing capability in hairy roots                                   |                                                                                                          |                                                                  |
|               | [24]                         |      | <i>Isoflavonoid syntase</i>                                                                                                                                    | CE                                                      | metabolic engineering (phenotyping for changes in isoflavone metabolic pathway)       |                                                                                                          |                                                                  |
|               | [25]                         |      | 74 nodulation genes; 27 seed genes                                                                                                                             | CP                                                      | testing of genome editing eviciency before stable transformation                      |                                                                                                          |                                                                  |
|               | <i>Glycine max</i> (soybean) | [26] | 2020                                                                                                                                                           | <i>Rg1</i>                                              | CP                                                                                    |                                                                                                          | RN symbiosis investigation (phenotyping for nodules formation)   |
|               |                              | [27] |                                                                                                                                                                | <i>galactinol synthase (GOLS) genes: GOLS1A; GOLS1B</i> | CE                                                                                    |                                                                                                          | testing of genome editing eviciency before stable transformation |
|               |                              | [29] |                                                                                                                                                                | <i>GmPHR1; GmPHR4</i>                                   | CP                                                                                    |                                                                                                          | RN symbiosis investigation (phenotyping for nodules formation)   |
|               |                              | [31] |                                                                                                                                                                | <i>GmF3H1; GmF3H2; GmFNSII-1</i>                        | CE                                                                                    |                                                                                                          | testing of genome editing eviciency before stable transformation |
|               |                              | [32] |                                                                                                                                                                | <i>GmAGO7a; b</i>                                       | CP                                                                                    |                                                                                                          |                                                                  |

| Plant species                | Reference | Year | Gene chosen for genome editing (name or ID)                                                           | Method of hairy roots obtaining* | Aims of studies reporting only identification of genome editing events in hairy roots | Aims of studies using both identification of genome editing events and phenotyping of edited hairy roots             |
|------------------------------|-----------|------|-------------------------------------------------------------------------------------------------------|----------------------------------|---------------------------------------------------------------------------------------|----------------------------------------------------------------------------------------------------------------------|
| <i>Glycine max</i> (soybean) | [33]      | 2021 | <i>Glyma15G191200</i>                                                                                 | CE                               |                                                                                       | investigation of resistance to the biotic stress conditions (phenotyping for resistance to soybean cyst nematode)    |
|                              | [34]      |      | <i>GmIPK1; GmIPK2</i>                                                                                 |                                  | testing of genome editing capability in hairy roots                                   |                                                                                                                      |
|                              | [35]      |      | <i>Glyma06g14180</i>                                                                                  |                                  |                                                                                       |                                                                                                                      |
|                              | [36]      |      | <i>DELLA 11 and 18; WI12<sup>Rhg1</sup></i>                                                           | CE                               |                                                                                       | investigation of resistance to the biotic stress conditions (phenotyping of interaction with root knot nematode)     |
|                              | [37]      |      | <i>FAD2-A (Glyma10g42470); MCT (Glyma10G276600); RPL15 (Glyma10G273900); PDCD6IP (Glyma10G266600)</i> |                                  | testing of genome editing capability in hairy roots                                   |                                                                                                                      |
|                              | [38]      |      | <i>GmNAC06</i>                                                                                        | CP                               |                                                                                       | investigation of resistance to the abiotic stress conditions (phenotyping of sensitivity to the salinity)            |
|                              | [39]      | 2021 | <i>GW2</i>                                                                                            | CE                               | testing of genome editing capability in hairy roots                                   |                                                                                                                      |
|                              | [40]      |      | <i>GmCRY1a-1d; 2a-2b</i>                                                                              | CP                               | testing of genome editing efficiency before stable transformation                     |                                                                                                                      |
|                              | [41]      |      | <i>lncRNA77580</i>                                                                                    | HE                               |                                                                                       | investigation of resistance to the abiotic stress conditions (phenotyping for gene expression driven by salt stress) |
|                              | [42]      |      | <i>GmNHX5</i>                                                                                         | CE                               |                                                                                       | investigation of resistance to the abiotic stress conditions (phenotyping of sensitivity to the salinity)            |
|                              | [43]      |      | <i>galactinol synthase genes (G03 and G19)</i>                                                        | CE                               | testing of genome editing capability in hairy roots                                   |                                                                                                                      |
|                              | [44]      |      | <i>GmpPLA-IIε; GmpPLA-IIζ</i>                                                                         | CE                               | testing of genome editing efficiency before stable transformation                     |                                                                                                                      |
|                              | [45]      |      | <i>GmCONSTANS</i>                                                                                     | CE                               | testing of genome editing capability in hairy roots                                   |                                                                                                                      |
|                              | [46]      |      | <i>miR169c</i>                                                                                        | CP                               | testing of genome editing efficiency before stable transformation                     | RN symbiosis investigation (phenotyping for nodules formation)                                                       |

| Plant species                                    | Reference | Year | Gene chosen for genome editing (name or ID)                                                                            | Method of hairy roots obtaining* | Aims of studies reporting only identification of genome editing events in hairy roots | Aims of studies using both identification of genome editing events and phenotyping of edited hairy roots                 |
|--------------------------------------------------|-----------|------|------------------------------------------------------------------------------------------------------------------------|----------------------------------|---------------------------------------------------------------------------------------|--------------------------------------------------------------------------------------------------------------------------|
|                                                  | [47]      |      | <i>GmDDR1</i>                                                                                                          | not reported                     |                                                                                       | investigation of resistance to the biotic stress conditions (phenotyping for resistance to <i>Phytophthora sojae</i> )   |
| <i>Glycine soja</i> (wild soybean)               | [48]      | 2020 | <i>SOS1</i> (plasma membrane Na <sup>+</sup> /H <sup>+</sup> antiporter); nonselective cation channels ( <i>NSCC</i> ) | CP                               |                                                                                       | root development (phenotyping for root to shoot Na <sup>+</sup> and K <sup>+</sup> transport)                            |
| <i>Glycyrrhiza glabra</i> (liquorice)            | [49]      | 2021 | <i>F5H</i>                                                                                                             | HE                               |                                                                                       | metabolic engineering (phenotyping for changes of glycyrrhizin (glycyrrhizic acid) content)                              |
| <i>Glycyrrhiza uralensis</i> (Chinese liquorice) | [50]      | 2021 | $\beta$ -AS                                                                                                            | HE                               |                                                                                       |                                                                                                                          |
| <i>Gossypium hirsutum</i> (cotton)               | [51]      | 2021 | <i>GhMYB25-like A and D</i>                                                                                            | CP                               | testing of genome editing capability in hairy roots                                   |                                                                                                                          |
|                                                  | [52]      | 2016 | <i>Leghemoglobins (Lb) b1; b2 and b3</i>                                                                               |                                  |                                                                                       | RN symbiosis investigation (phenotyping for nodules formation)                                                           |
| <i>Lotus japonicus</i>                           |           |      |                                                                                                                        | CP                               |                                                                                       | metabolic engineering (phenotyping of changes in C-28 oxidized triterpenoid production)                                  |
|                                                  | [53]      | 2019 | <i>CYP716A51</i>                                                                                                       |                                  |                                                                                       |                                                                                                                          |
|                                                  | [54,55]   | 2020 | <i>LaALMT1</i> (( <i>Al</i> )-activated malate transporter 1)                                                          | CP                               |                                                                                       | root development (phenotyping for root to shoot transport: characterization of xylem sap and shoot metal concentrations) |
| <i>Lupinus albus</i> (white lupin)               |           |      |                                                                                                                        |                                  |                                                                                       | root development (evaluation of citrate secretion from roots under low phosphorus conditions)                            |
|                                                  | [54,56]   | 2021 | <i>LaMATE</i> ; <i>LaMATE3</i> (Multidrug and Toxic Compound Extrusion)                                                | CP                               |                                                                                       | metabolic engineering (phenotyping for changes of isoflavonoids or their glycosides content)                             |
|                                                  | [13]      | 2015 | <i>GUS</i> gene in <i>GUS</i> barrelclover line                                                                        | CP                               | testing of genome editing capability in hairy roots                                   |                                                                                                                          |
| <i>Medicago truncatula</i>                       | [57]      | 2017 | <i>DZA315</i> ( <i>Fix</i> <sup>+</sup> ) allele of <i>Medtr8g465280</i> ( <i>NFS2</i> )                               | CP                               |                                                                                       | RN symbiosis investigation (phenotyping for nodules formation)                                                           |
|                                                  | [58]      |      | <i>NCR-<math>\alpha</math></i> ; <i>NCR-<math>\beta</math></i>                                                         |                                  |                                                                                       |                                                                                                                          |
|                                                  | [59]      | 2018 | <i>NFS</i> <sup>1</sup> ; <i>NFS</i> <sup>2</sup> alleles                                                              | CP                               |                                                                                       | RN symbiosis investigation (phenotyping for nodules formation)                                                           |

| Plant species                                | Reference | Year | Gene chosen for genome editing (name or ID)                    | Method of hairy roots obtaining* | Aims of studies reporting only identification of genome editing events in hairy roots          | Aims of studies using both identification of genome editing events and phenotyping of edited hairy roots                                                 |
|----------------------------------------------|-----------|------|----------------------------------------------------------------|----------------------------------|------------------------------------------------------------------------------------------------|----------------------------------------------------------------------------------------------------------------------------------------------------------|
|                                              | [60]      | 2020 | <i>PDS</i>                                                     | HE                               | regeneration to the whole genome edited plant                                                  | RN symbiosis investigation (phenotyping for Rhizobial early infection events)                                                                            |
|                                              | [61]      |      | <i>MtCRA2; MtEIN2</i>                                          | CP                               |                                                                                                |                                                                                                                                                          |
| <i>Nicotiana tabacum</i> (tobacco)           | [62]      | 2020 | <i>N-methylputrescine oxidase (MPO) gene family</i>            | LE                               | regeneration to the whole genome edited plant                                                  |                                                                                                                                                          |
| <i>Ophiorrhiza pumila</i>                    | [63]      | 2020 | <i>secologanin synthetase; geraniol-10-hydroxylase</i>         | SE                               |                                                                                                | metabolic engineering (phenotyping for changes of camptothecin production)                                                                               |
| <i>Phtheirospermum japonicum</i>             | [64]      | 2021 | <i>PjIPT1a</i>                                                 | CP                               |                                                                                                | investigation of resistance to the biotic stress conditions (phenotyping of interaction between hemiparasitic plant <i>P. japonicum</i> and Arabidopsis) |
| <i>Populus tremula x alba</i> (hybrid polar) | [65]      | 2020 | <i>UDP-dependent glycosyltransferases (UGT71L1, UGT78M1)</i>   | LE                               |                                                                                                | metabolic engineering (phenotyping for changes of salicinoid content)                                                                                    |
|                                              | [66]      | 2021 | <i>SHORTROOT; YUC4; PLETHORA1; LBD4; LBD12</i>                 | LE                               | testing of genome editing capability in hairy roots (for <i>YUC4; PLETHORA1; LBD4; LBD12</i> ) | root development (phenotyping for endodermis development: for <i>SHORTROOT</i> )                                                                         |
| <i>Punica granatum</i> (pomegranate)         | [67]      | 2019 | <i>UDP-dependent glycosyltransferases (UDP84A23; UDP84A24)</i> | HE                               |                                                                                                | metabolic engineering (phenotyping for changes of gallic acid and its glycosides content)                                                                |
| <i>Salvia miltiorrhiza</i> (red sage)        | [68]      | 2017 | <i>committed diterpene synthase 1</i>                          | LE                               |                                                                                                | metabolic engineering (phenotyping for changes of tashinones (Ts) content)                                                                               |
|                                              | [69]      | 2018 | <i>rosmarinic acid synthase</i>                                |                                  |                                                                                                | metabolic engineering (phenotyping for changes of lithospermic acid and its precursors)                                                                  |
|                                              | [70]      | 2020 | <i>bZIP1</i>                                                   | LE                               |                                                                                                | metabolic engineering (phenotyping for changes in phenolic acid and Ts content)                                                                          |
|                                              | [71]      |      | <i>MYB98</i>                                                   |                                  |                                                                                                | metabolic engineering (phenotyping for changes in salvinalonic acid B (SAB) and Ts content)                                                              |



| Plant species                         | Reference | Year | Gene chosen for genome editing (name or ID)                                       | Method of hairy roots obtaining* | Aims of studies reporting only identification of genome editing events in hairy roots | Aims of studies using both identification of genome editing events and phenotyping of edited hairy roots                                                                     |
|---------------------------------------|-----------|------|-----------------------------------------------------------------------------------|----------------------------------|---------------------------------------------------------------------------------------|------------------------------------------------------------------------------------------------------------------------------------------------------------------------------|
| <i>Solanum lycopersicum</i> (tomato)  | [72]      | 2021 | <i>SmKFB5</i>                                                                     |                                  |                                                                                       | metabolic engineering (phenotyping for changes in SAB, rosmarinic (RA) and caffeic acids content)                                                                            |
|                                       | [73]      |      | 23 LACCASE genes (1-4; 8-13; 15-24; 26-28)                                        |                                  |                                                                                       | metabolic engineering (phenotyping for changes in SAB, RA content; lignin biosynthesis pathway)                                                                              |
|                                       | [74]      | 2014 | <i>GFP</i> and <i>SHR</i> genes in <i>SlSCRpro:modified (m) mGFP5</i> tomato line | CP                               | testing of genome editing capability in hairy roots (for <i>GFP</i> )                 | root development (phenotyping for meristem size: for <i>SHR</i> )                                                                                                            |
|                                       | [75]      | 2016 | no genes were reported                                                            | CE                               | testing of genome editing capability in hairy roots                                   |                                                                                                                                                                              |
|                                       | [76]      | 2019 | <i>Sl5αR1</i> ; <i>R2</i>                                                         | HE                               |                                                                                       | metabolic engineering (phenotyping for changes in α-tomatine and dehydrotomatine biosynthesis pathway)                                                                       |
| <i>Solanum tuberosum</i> (potato)     | [77]      | 2020 | <i>MYC1</i> ; <i>MYC2</i> ; <i>COI1</i> ; <i>C5-SD2</i>                           | CE                               |                                                                                       | metabolic engineering (phenotyping for changes in α-tomatine and dehydrotomatine biosynthesis via suppression of cholesterol and steroidal glycoalkaloid biosynthesis genes) |
|                                       | [5]       | 2018 | <i>St16DOX</i> (2-oxoglutarate-dependent dioxygenase)                             | CP                               |                                                                                       | metabolic engineering (phenotyping for changes in α-solanine and α-chaconine biosynthesis pathway)                                                                           |
|                                       | [79]      | 2020 | <i>PDS</i>                                                                        | SE                               | regeneration to the whole genome edited plant                                         |                                                                                                                                                                              |
| <i>Symphytum officinale</i> (comfrey) | [81]      |      | <i>GFP</i> gene in <i>GFP</i> potato line; nonexpresser of pathogenesis-related 3 | CP                               | testing of genome editing capability in hairy roots (for <i>GFP</i> )                 | investigation of resistance to the biotic stress conditions (phenotyping of tolerance to <i>Candidatus Liberibacter solanacearum</i> )                                       |
|                                       | [82]      | 2021 | homospermidine synthase                                                           | LE                               |                                                                                       | metabolic engineering (phenotyping for changes of homospermydine content)                                                                                                    |

| Plant species                                     | Reference | Year | Gene chosen for genome editing<br>(name or ID) | Method of hairy<br>roots obtaining* | Aims of studies reporting only<br>identification of genome editing<br>events in hairy roots | Aims of studies using both<br>identification of genome editing events<br>and phenotyping of edited hairy roots |
|---------------------------------------------------|-----------|------|------------------------------------------------|-------------------------------------|---------------------------------------------------------------------------------------------|----------------------------------------------------------------------------------------------------------------|
| <i>Taraxacum kok-saghyz</i><br>(rubber dandelion) | [84]      | 2016 | <i>fructan:fructan 1-fructosyltransferase</i>  | CP                                  | regeneration to the whole genome<br>edited plant                                            |                                                                                                                |
| <i>Vigna unguiculata</i><br>(cowpea)              | [86]      | 2019 | <i>VuSYMRK</i>                                 | CP                                  |                                                                                             | RN symbiosis investigation<br>(phenotyping for nodules formation)                                              |

\*Hairy roots were obtained from composite plants (CP); cotyledon explants (CE); hypocotyl explants (HE); leaf explants (LE) or stem explants (SE).

## Supplementary references

1. Yuan, M.; Zhu, J.; Gong, L.; He, L.; Lee, C.; Han, S.; Chen, C.; He, G. Mutagenesis of *FAD2* genes in peanut with CRISPR/Cas9 based gene editing. *BMC Biotechnol.* **2019**, *19*, 1-7, doi:10.1186/s12896-019-0516-8.
2. Jacobs, T.B.; LaFayette, P.R.; Schmitz, R.J.; Parrott, W.A. Targeted genome modifications in soybean with CRISPR/Cas9. *BMC Biotechnol.* **2015**, *15*, 1-10, doi:10.1186/s12896-015-0131-2.
3. Shu, H.; Luo, Z.; Peng, Z.; Wang, J. The application of CRISPR/Cas9 in hairy roots to explore the functions of *AhNFR1* and *AhNFR5* genes during peanut nodulation. *BMC Plant Biol.* **2020**, *20*, 1-15, doi:10.1186/s12870-020-02614-x.
4. Hasebe, F.; Yuba, H.; Hashimoto, T.; Saito, K.; Funa, N.; Shoji, T. CRISPR/Cas9-mediated disruption of the *PYRROLIDINE KETIDE SYNTHASE* gene reduces the accumulation of tropane alkaloids in *Atropa belladonna* hairy roots. *Biosci., Biotechnol., Biochem.* **2021**, *85*, 2404-2409, doi:10.1093/bbb/zbab165.
5. Nakayasu, M.; Akiyama, R.; Lee, H.J.; Osakabe, K.; Osakabe, Y.; Watanabe, B.; Sugimoto, Y.; Umemoto, N.; Saito, K.; Muranaka, T., et al. Generation of  $\alpha$ -solanine-free hairy roots of potato by CRISPR/Cas9 mediated genome editing of the *St16DOX* gene. *Plant Physiol. Biochem.* **2018**, *131*, 70-77, doi:10.1016/j.plaphy.2018.04.026.
6. Kirchner, T.W.; Niehaus, M.; Debener, T.; Schenk, M.K.; Herde, M. Efficient generation of mutations mediated by CRISPR/Cas9 in the hairy root transformation system of *Brassica carinata*. *PLOS ONE* **2017**, *12*, 1-20, doi:10.1371/journal.pone.0185429.
7. Pröbsting, M. Application of CRISPR-Cas9 genome editing systems for improving oilseed rape (*Brassica napus*) disease resistance against *Verticillium longisporum*. PhD thesis, Kiel University, 2020.
8. Grützner, R.; Martin, P.; Horn, C.; Mortensen, S.; Cram, E.J.; Lee-Parsons, C.W.T.; Stuttmann, J.; Marillonnet, S. High-efficiency genome editing in plants mediated by a Cas9 gene containing multiple introns. *Plant Commun.* **2021**, *2*, 1-15, doi:10.1016/j.xplc.2020.100135.
9. Bernard, G.; Gagneul, D.; Alves Dos Santos, H.; Etienne, A.; Hilbert, J.-L.; Rambaud, C. Efficient genome editing using CRISPR/Cas9 technology in Chicory. *Int. J. Mol. Sci.* **2019**, *20*, 1-18, doi:10.3390/ijms20051155.
10. Ma, X.; Zhang, Q.; Zhu, Q.; Liu, W.; Chen, Y.; Qiu, R.; Wang, B.; Yang, Z.; Li, H.; Lin, Y., et al. A robust CRISPR/Cas9 system for convenient, high-efficiency multiplex genome editing in monocot and dicot plants. *Mol. Plant* **2015**, *8*, 1274-1284, doi:10.1016/j.molp.2015.04.007.
11. Dai, Y.; Hu, G.; Dupas, A.; Medina, L.; Blandels, N.; San Clemente, H.; Ladouce, N.; Badawi, M.; Hernandez-Raquet, G.; Mounet, F., et al. Implementing the CRISPR/Cas9 technology in Eucalyptus hairy roots using wood-related genes. *Int. J. Mol. Sci.* **2020**, *21*, 1-22, doi:10.3390/ijms21103408.
12. Cai, Y.; Chen, L.; Liu, X.; Sun, S.; Wu, C.; Jiang, B.; Han, T.; Hou, W. CRISPR/Cas9-mediated genome editing in soybean hairy roots. *PLOS ONE* **2015**, *10*, 1-13, doi:10.1371/journal.pone.0136064.
13. Michno, J.-M.; Wang, X.; Liu, J.; Curtin, S.J.; Kono, T.J.Y.; Stupar, R.M. CRISPR/Cas mutagenesis of soybean and *Medicago truncatula* using a new web-tool and a modified Cas9 enzyme. *GM Crops & Food* **2015**, *6*, 243-252, doi:10.1080/21645698.2015.1106063.
14. Sun, X.; Hu, Z.; Chen, R.; Jiang, Q.; Song, G.; Zhang, H.; Xi, Y. Targeted mutagenesis in soybean using the CRISPR-Cas9 system. *Sci. Rep.* **2015**, *5*, 1-10, doi:10.1038/srep10342.

15. Du, H.; Zeng, X.; Zhao, M.; Cui, X.; Wang, Q.; Yang, H.; Cheng, H.; Yu, D. Efficient targeted mutagenesis in soybean by TALENs and CRISPR/Cas9. *J. Biotechnol.* **2016**, *217*, 90–97, doi:10.1016/j.jbiotec.2015.11.005.
16. Tang, F.; Yang, S.; Liu, J.; Zhu, H. *Rj4*, a gene controlling nodulation specificity in soybeans, encodes a thaumatin-like protein but not the one previously reported. *Plant Physiol.* **2016**, *170*, 26–32, doi:10.1104/pp.15.01661.
17. Xing, H.-L.; Dong, L.; Wang, Z.-P.; Zhang, H.-Y.; Han, C.-Y.; Liu, B.; Wang, X.-C.; Chen, Q.-J. A CRISPR/Cas9 toolkit for multiplex genome editing in plants. *BMC Plant Biol.* **2014**, *14*, 1–12, doi:10.1186/s12870-014-0327-y.
18. Fan, Y.; Liu, J.; Lyu, S.; Wang, Q.; Yang, S.; Zhu, H. The soybean *Rfg1* gene restricts nodulation by *Sinorhizobium fredii* USDA193. *Front. Plant Sci.* **2017**, *8*, 1–9, doi:10.3389/fpls.2017.01548.
19. Du, Y.-T.; Zhao, M.-J.; Wang, C.-T.; Gao, Y.; Wang, Y.-X.; Liu, Y.-W.; Chen, M.; Chen, J.; Zhou, Y.-B.; Xu, Z.-S., et al. Identification and characterization of *GmMYB118* responses to drought and salt stress. *BMC Plant Biol.* **2018**, *18*, 1–18, doi:10.1186/s12870-018-1551-7.
20. Tang, T.; Yu, X.; Yang, H.; Gao, Q.; Ji, H.; Wang, Y.; Yan, G.; Peng, Y.; Luo, H.; Liu, K., et al. Development and validation of an effective CRISPR/Cas9 vector for efficiently isolating positive transformants and transgene-free mutants in a wide range of plant species. *Front. Plant Sci.* **2018**, *9*, 1–14, doi:10.3389/fpls.2018.01533.
21. Cheng, Q.; Dong, L.; Su, T.; Li, T.; Gan, Z.; Nan, H.; Lu, S.; Fang, C.; Kong, L.; Li, H., et al. CRISPR/Cas9-mediated targeted mutagenesis of *GmLHY* genes alters plant height and internode length in soybean. *BMC Plant Biol.* **2019**, *19*, 1–11, doi:10.1186/s12870-019-2145-8.
22. Do, P.T.; Nguyen, C.X.; Bui, H.T.; Tran, L.T.N.; Stacey, G.; Gillman, J.D.; Zhang, Z.J.; Stacey, M.G. Demonstration of highly efficient dual gRNA CRISPR/Cas9 editing of the homeologous *GmFAD2-1A* and *GmFAD2-1B* genes to yield a high oleic, low linoleic and  $\alpha$ -linolenic acid phenotype in soybean. *BMC Plant Biol.* **2019**, *19*, 1–14, doi:10.1186/s12870-019-1906-8.
23. Li, C.; Nguyen, V.; Liu, J.; Fu, W.; Chen, C.; Yu, K.; Cui, Y. Mutagenesis of seed storage protein genes in soybean using CRISPR/Cas9. *BMC Res. Notes* **2019**, *12*, 1–7, doi:10.1186/s13104-019-4207-2.
24. Uchida, K. A study on isoflavonoid metabolism using CRISPR/Cas9 in soybean. *Soy Protein Research, Japan* **2019**, *22*, 152–156.
25. Bai, M.; Yuan, J.; Kuang, H.; Gong, P.; Li, S.; Zhang, Z.; Liu, B.; Sun, J.; Yang, M.; Yang, L., et al. Generation of a multiplex mutagenesis population via pooled CRISPR-Cas9 in soya bean. *Plant Biotechnol. J.* **2020**, *18*, 721–731, doi:10.1111/pbi.13239.
26. Fan, Y.; Wang, X.; Li, H.; Liu, S.; Jin, L.; Lyu, Y.; Shi, M.; Liu, S.; Yang, X.; Lyu, S. Anthocyanin, a novel and user-friendly reporter for convenient, non-destructive, low cost, directly visual selection of transgenic hairy roots in the study of rhizobia-legume symbiosis. *Plant Methods* **2020**, *16*, 1–8, doi:10.1186/s13007-020-00638-w.
27. Le, H.; Nguyen, N.H.; Ta, D.T.; Le, T.N.T.; Bui, T.P.; Le, N.T.; Nguyen, C.X.; Rolletschek, H.; Stacey, G.; Stacey, M.G., et al. CRISPR/Cas9-mediated knockout of galactinol synthase-encoding genes reduces raffinose family oligosaccharide levels in soybean seeds. *Front. Plant Sci.* **2020**, *11*, 1–13, doi:10.3389/fpls.2020.612942.
28. Li, J.-F.; Norville, J.E.; Aach, J.; McCormack, M.; Zhang, D.; Bush, J.; Church, G.M.; Sheen, J. Multiplex and homologous recombination-mediated genome editing in *Arabidopsis* and *Nicotiana benthamiana* using guide RNA and Cas9. *Nat. Biotechnol.* **2013**, *31*, 688–691, doi:10.1038/nbt.2654.

- 
29. Lu, M.; Cheng, Z.; Zhang, X.-M.; Huang, P.; Fan, C.; Yu, G.; Chen, F.; Xu, K.; Chen, Q.; Miao, Y., et al. Spatial divergence of *PHR-PHT1* modules maintains phosphorus homeostasis in soybean nodules. *Plant Physiol.* **2020**, *184*, 236–250, doi:10.1104/pp.19.01209.
30. Lin, M.-H.; Gresshoff, P.M.; Indrasumunar, A.; Ferguson, B.J. pHairyRed: a novel binary vector containing the DsRed2 reporter gene for visual selection of transgenic hairy roots. *Mol. Plant* **2011**, *4*, 537–545, doi:10.1093/mp/ssq084.
31. Zhang, P.; Du, H.; Wang, J.; Pu, Y.; Yang, C.; Yan, R.; Yang, H.; Cheng, H.; Yu, D. Multiplex CRISPR/Cas9-mediated metabolic engineering increases soya bean isoflavone content and resistance to soya bean mosaic virus. *Plant Biotechnol. J.* **2020**, *18*, 1384–1395, doi:10.1111/pbi.13302.
32. Zheng, N.; Li, T.; Dittman, J.D.; Su, J.; Li, R.; Gassmann, W.; Peng, D.; Whitham, S.A.; Liu, S.; Yang, B. CRISPR/Cas9-based gene editing using egg cell-specific promoters in Arabidopsis and soybean. *Front. Plant Sci.* **2020**, *11*, 1–15, doi:10.3389/fpls.2020.00800.
33. Butler, K.J.; Fliege, C.; Zapotocny, R.; Diers, B.; Hudson, M.; Bent, A.F. Soybean cyst nematode resistance quantitative trait locus *cqSCN-006* alters the expression of a  $\gamma$ -SNAP protein. *Mol. Plant-Microbe Interact.* **2021**, *MPMI07210163R*, 1–13, doi:10.1094/mpmi-07-21-0163-r.
34. Carrijo, J.; Illa-Berenguer, E.; LaFayette, P.; Torres, N.; Aragão, F.J.L.; Parrott, W.; Vianna, G.R. Two efficient CRISPR/Cas9 systems for gene editing in soybean. *Transgenic Res.* **2021**, *30*, 239–249, doi:10.1007/s11248-021-00246-x.
35. Cheng, Y.; Wang, X.; Cao, L.; Ji, J.; Liu, T.; Duan, K. Highly efficient *Agrobacterium rhizogenes*-mediated hairy root transformation for gene functional and gene editing analysis in soybean. *Plant Methods* **2021**, *17*, 1–12, doi:10.1186/s13007-021-00778-7.
36. Dong, J.; Hudson, M.E. *WI12<sup>Rhg1</sup>* interacts with DELLAs and mediates soybean cyst nematode resistance through hormone pathways. *Plant Biotechnol. J.* **2021**, *pbi.13709*, 1–14, doi:10.1111/pbi.13709.
37. Duan, K.; Cheng, Y.; Ji, J.; Wang, C.; Wei, Y.; Wang, Y. Large chromosomal segment deletions by CRISPR/LbCpf1-mediated multiplex gene editing in soybean. *J. Integr. Plant Biol.* **2021**, *63*, 1620–1631, doi:10.1111/jipb.13158.
38. Li, M.; Chen, R.; Jiang, Q.; Sun, X.; Zhang, H.; Hu, Z. GmNAC06, a NAC domain transcription factor enhances salt stress tolerance in soybean. *Plant Mol. Biol.* **2021**, *105*, 333–345, doi:10.1007/s11103-020-01091-y.
39. Luo, Y.; Na, R.; Nowak, J.S.; Qiu, Y.; Lu, Q.S.; Yang, C.; Marsolais, F.; Tian, L. Development of a Csy4-processed guide RNA delivery system with soybean-infecting virus ALSV for genome editing. *BMC Plant Biol.* **2021**, *21*, 1–12, doi:10.1186/s12870-021-03138-8.
40. Lyu, X.; Cheng, Q.; Qin, C.; Li, Y.; Xu, X.; Ji, R.; Mu, R.; Li, H.; Zhao, T.; Liu, J., et al. GmCRY1s modulate gibberellin metabolism to regulate soybean shade avoidance in response to reduced blue light. *Mol. Plant* **2021**, *14*, 298–314, doi:10.1016/j.molp.2020.11.016.
41. Niu, F.; Jiang, Q.; Sun, X.; Hu, Z.; Wang, L.; Zhang, H. Large DNA fragment deletion in *lncRNA77580* regulates neighboring gene expression in soybean (*Glycine max*). *Funct. Plant Biol.* **2021**, *48*, 1139–1147, doi:10.1071/FP20400.
42. Sun, T.; Ma, N.; Wang, C.; Fan, H.; Wang, M.; Zhang, J.; Cao, J.; Wang, D. A Golgi-localized sodium/hydrogen exchanger positively regulates salt tolerance by maintaining higher K<sup>+</sup>/Na<sup>+</sup> ratio in soybean. *Front. Plant Sci.* **2021**, *12*, 1–15, doi:10.3389/fpls.2021.638340.

43. Thao, L.T.N.; Nhung, N.H.; Huy, L.Q.; Thao, B.P.; Ngoc, L.T.; Ngoc, P.B.; Ha, C.H.; Phat, D.T. Development of an *in vitro* hairy root induction system in different soybean cultivars for gene expression and genome editing studies. *Vietnam Journal of Biotechnology* **2021**, *19*, 459–470, doi:10.15625/1811-4989/15421.
44. Xiao, Y.; Karikari, B.; Wang, L.; Chang, F.; Zhao, T. Structure characterization and potential role of soybean phospholipases A multigene family in response to multiple abiotic stress uncovered by CRISPR/Cas9 technology. *Environ. Exp. Bot.* **2021**, *188*, 1–14, doi:10.1016/j.envexpbot.2021.104521.
45. Xiong, Y.-P.; Xu, C.-J.; Jin-Ming, S.; Zhao, L. Detection of target sites of CRISPR/Cas9 system in soybean mediated by *Agrobacterium rhizogenes*. *Chinese Journal of Oil Crop Sciences* **2021**, *43*, 161–170, doi:10.19802/j.issn.1007-9084.2020337.
46. Xu, H.; Li, Y.; Zhang, K.; Li, M.; Fu, S.; Tian, Y.; Qin, T.; Li, X.; Zhong, Y.; Liao, H. *miR169c-NFYA-C-ENOD40* modulates nitrogen inhibitory effects in soybean nodulation. *New Phytol.* **2021**, *229*, 3377–3392, doi:10.1111/nph.17115.
47. Yu, G.; Zou, J.; Wang, J.; Zhu, R.; Qi, Z.; Jiang, H.; Hu, Z.; Yang, M.; Zhao, Y.; Wu, X., et al. A soybean NAC homolog contributes to resistance to *Phytophthora sojae* mediated by dirigent proteins. *Crop J.* **2021**, *In press (corrected proof)*, 1–10, doi:10.1016/j.cj.2021.08.009.
48. Niu, F.; Jiang, Q.; Cheng, R.; Sun, X.; Hu, Z.; Wang, L.; Zhang, H. CRISPR/Cas9-mediated targeted mutagenesis of wild soybean (*Glycine soja*) hairy roots altered the transcription profile of the mutant. *J. Agric. Sci.* **2020**, *12*, 14–25, doi:10.5539/jas.v12n9p14
49. Zhang, Z.; Wang, D.; Yang, L.; Tian, S.; Yao, X.; Liu, Y. Ferulate 5-hydroxylase gene (*F5H*) regulation of glycyrrhizic acid biosynthesis determined by gene overexpression and knockout. *Acta Pharm. Sin.* **2021**, *56*, 1719–1726, doi:10.16438/j.0513-4870.2021-0196.
50. Wang, D.; Zhang, Z.; Yang, L.; Tian, S.; Liu, Y. *ARPI*,  $\beta$ -*AS*, and *UGE* regulate glycyrrhizin biosynthesis in *Glycyrrhiza uralensis* hairy roots. *Plant Cell Rep.* **2021**, *40*, 1285–1296, doi:10.1007/s00299-021-02712-6.
51. Lili, Z.; Yali, W.; Peilin, W.; Jiamin, W.; Hongmei, C. Detection of target sites edited in upland cotton by the CRISPR/Cas9 system mediated by *Agrobacterium rhizogenes*. *BMC Plant Biol.* **2021**, *In press (under review)*, doi:10.21203/rs.3.rs-1105254/v1.
52. Wang, L.; Wang, L.; Tan, Q.; Fan, Q.; Zhu, H.; Hong, Z.; Zhang, Z.; Duanmu, D. Efficient inactivation of symbiotic nitrogen fixation related genes in *Lotus japonicus* using CRISPR/Cas9. *Front. Plant Sci.* **2016**, *7*, 1–22, doi:10.3389/fpls.2016.01333.
53. Suzuki, H.; Fukushima, E.O.; Shimizu, Y.; Seki, H.; Fujisawa, Y.; Ishimoto, M.; Osakabe, K.; Osakabe, Y.; Muranaka, T. *Lotus japonicus* triterpenoid profile and characterization of the *CYP716A51* and *LjCYP93E1* genes involved in their biosynthesis *in planta*. *Plant Cell Physiol.* **2019**, *60*, 2496–2509, doi:10.1093/pcp/pcz145.
54. Zhou, Y. Functional characterization of genes involved in development and function of cluster roots in *Lupinus albus*. PhD thesis, University of Hohenheim, 2019.
55. Zhou, Y.; Neuhäuser, B.; Neumann, G.; Ludewig, U. LaALMT1 mediates malate release from phosphorus-deficient white lupin root tips and metal root to shoot translocation. *Plant Cell and Environ.* **2020**, *43*, 1691–1706, doi:10.1111/pce.13762.
56. Zhou, Y.; Olt, P.; Neuhäuser, B.; Moradtalab, N.; Bautista, W.; Uhde-Stone, C.; Neumann, G.; Ludewig, U. Loss of LaMATE impairs isoflavonoid release from cluster roots of phosphorus-deficient white lupin. *Physiol. Plant.* **2021**, *173*, 1207–1220, doi:10.1111/pp1.13515.

57. Wang, Q.; Yang, S.; Liu, J.; Terecskei, K.; Ábrahám, E.; Gombár, A.; Domonkos, Á.; Szűcs, A.; Körmöczi, P.; Wang, T., et al. Host-secreted antimicrobial peptide enforces symbiotic selectivity in *Medicago truncatula*. *Proc. Natl. Acad. Sci. U.S.A.* **2017**, *114*, 6854–6859, doi:10.1073/pnas.1700715114.
58. Yang, S.; Wang, Q.; Fedorova, E.; Liu, J.; Qin, Q.; Zheng, Q.; Price, P.A.; Pan, H.; Wang, D.; Griffiths, J.S., et al. Microsymbiont discrimination mediated by a host-secreted peptide in *Medicago truncatula*. *Proc. Natl. Acad. Sci. U.S.A.* **2017**, *114*, 6848–6853, doi:10.1073/pnas.1700460114.
59. Wang, Q.; Liu, J.; Li, H.; Yang, S.; Körmöczi, P.; Kereszt, A.; Zhu, H. Nodule-specific cysteine-rich peptides negatively regulate nitrogen-fixing symbiosis in a strain-specific manner in *Medicago truncatula*. *Mol. Plant-Microbe Interact.* **2018**, *31*, 240–248, doi:10.1094/mpmi-08-17-0207-r.
60. Zhang, H.; Cao, Y.; Zhang, H.; Xu, Y.; Zhou, C.; Liu, W.; Zhu, R.; Shang, C.; Li, J.; Shen, Z., et al. Efficient generation of CRISPR/Cas9-mediated homozygous/biallelic *Medicago truncatula* mutants using a hairy root system. *Front. Plant Sci.* **2020**, *11*, 1–11, doi:10.3389/fpls.2020.00294.
61. Zhu, F.; Deng, J.; Chen, H.; Liu, P.; Zheng, L.; Ye, Q.; Li, R.; Brault, M.; Wen, J.; Frugier, F., et al. A CEP peptide receptor-like kinase regulates auxin biosynthesis and ethylene signaling to coordinate root growth and symbiotic nodulation in *Medicago truncatula*. *Plant Cell* **2020**, *32*, 2855–2877, doi:10.1105/tpc.20.00248.
62. Vazquez-Vilar, M.; Garcia-Carpintero, V.; Selma, S.; Bernabé-Orts, J.M.; Sanchez-Vicente, J.; Salazar-Sarasua, B.; Ressa, A.; de Paola, C.; Ajenjo, M.; Fernández-del-Carmen, A., et al. Edition of complex gene families in tobacco with GoldenBraid 4.0, a multipurpose web-based platform for plant genome engineering. *bioRxiv* **2020**, 2020.10.06.327841, doi:10.1101/2020.10.06.327841.
63. Shi, M.; Gong, H.; Cui, L.; Wang, Q.; Wang, C.; Wang, Y.; Kai, G. Targeted metabolic engineering of committed steps improves anti-cancer drug camptothecin production in *Ophiorrhiza pumila* hairy roots. *Ind. Crops Prod.* **2020**, *148*, 1–9, doi:10.1016/j.indcrop.2020.112277.
64. Greifenhagen, A.; Braunstein, I.; Pfannstiel, J.; Yoshida, S.; Shirasu, K.; Schaller, A.; Spallek, T. The *Phtheirospermum japonicum* isopentenyltransferase PjIPT1a regulates host cytokinin responses in *Arabidopsis*. *New Phytol.* **2021**, *232*, 1582–1590, doi:10.1111/nph.17615.
65. Fellenberg, C.; Corea, O.; Yan, L.-H.; Archinuk, F.; Piirtola, E.-M.; Gordon, H.; Reichelt, M.; Brandt, W.; Wulff, J.; Ehrling, J., et al. Discovery of salicyl benzoate UDP-glycosyltransferase, a central enzyme in poplar salicinoid phenolic glycoside biosynthesis. *Plant J.* **2020**, *102*, 99–115, doi:10.1111/tpj.14615.
66. Triozzi, P.; Schmidt, H.W.; Dervinis, C.; Kirst, M.; Conde, D. Simple, efficient and open-source CRISPR/Cas9 strategy for multi-site genome editing in *Populus tremula* × *alba*. *Tree Physiol.* **2021**, *41*, 2216–2227, doi:10.1093/treephys/tpab066.
67. Chang, L.; Wu, S.; Tian, L. Effective genome editing and identification of a regiospecific gallic acid 4-O-glycosyltransferase in pomegranate (*Punica granatum* L.). *Hortic. Res.* **2019**, *6*, 1–15, doi:10.1038/s41438-019-0206-7.
68. Li, B.; Cui, G.; Shen, G.; Zhan, Z.; Huang, L.; Chen, J.; Qi, X. Targeted mutagenesis in the medicinal plant *Salvia miltiorrhiza*. *Sci. Rep.* **2017**, *7*, 1–9, doi:10.1038/srep43320.
69. Zhou, Z.; Tan, H.; Li, Q.; Chen, J.; Gao, S.; Wang, Y.; Chen, W.; Zhang, L. CRISPR/Cas9-mediated efficient targeted mutagenesis of RAS in *Salvia miltiorrhiza*. *Phytochemistry* **2018**, *148*, 63–70, doi:10.1016/j.phytochem.2018.01.015.
70. Deng, C.; Shi, M.; Fu, R.; Zhang, Y.; Wang, Q.; Zhou, Y.; Wang, Y.; Ma, X.; Kai, G. ABA-responsive transcription factor bZIP1 is involved in modulating biosynthesis of phenolic acids and taABA-responsive transcription factor bZIP1 is involved in shikonic acid biosynthesis in *Salvia miltiorrhiza*. *J. Exp. Bot.* **2020**, *71*, 5948–5962, doi:10.1093/jxb/eraa295.

- 
71. Hao, X.; Pu, Z.; Cao, G.; You, D.; Zhou, Y.; Deng, C.; Shi, M.; Nile, S.H.; Wang, Y.; Zhou, W., et al. Tanshinone and salvianolic acid biosynthesis are regulated by *SmMYB98* in *Salvia miltiorrhiza* hairy roots. *J. Adv. Res.* **2020**, *23*, 1–12, doi:10.1016/j.jare.2020.01.012.
72. Yu, H.; Li, D.; Yang, D.; Xue, Z.; Li, J.; Xing, B.; Yan, K.; Han, R.; Liang, Z. SmKFB5 protein regulates phenolic acid biosynthesis by controlling the degradation of phenylalanine ammonia-lyase in *Salvia miltiorrhiza*. *J. Exp. Bot.* **2021**, *72*, 4915–4925, doi:10.1093/jxb/erab172.
73. Zhou, Z.; Li, Q.; Xiao, L.; Wang, Y.; Feng, J.; Bu, Q.; Xiao, Y.; Hao, K.; Guo, M.; Chen, W., et al. Multiplexed CRISPR/Cas9-mediated knockout of Laccase genes in *Salvia miltiorrhiza* revealed their roles in growth, development, and metabolism. *Front. Plant Sci.* **2021**, *12*, 1–10, doi:10.3389/fpls.2021.647768.
74. Ron, M.; Kajala, K.; Pauluzzi, G.; Wang, D.; Reynoso, M.A.; Zumstein, K.; Garcha, J.; Winte, S.; Masson, H.; Inagaki, S., et al. Hairy root transformation using *Agrobacterium rhizogenes* as a tool for exploring cell type-specific gene expression and function using tomato as a model. *Plant Physiol.* **2014**, *166*, 455–469, doi:10.1104/pp.114.239392.
75. Jacobs, T.B.; Martin, G.B. High-throughput CRISPR vector construction and characterization of DNA modifications by generation of tomato hairy roots. *J. Vis. Exp.* **2016**, *110*, 1–6, doi:10.3791/53843.
76. Akiyama, R.; Lee, H.J.; Nakayasu, M.; Osakabe, K.; Osakabe, Y.; Umemoto, N.; Saito, K.; Muranaka, T.; Sugimoto, Y.; Mizutani, M. Characterization of steroid 5 $\alpha$ -reductase involved in  $\alpha$ -tomatine biosynthesis in tomatoes. *Plant Biotechnol.* **2019**, *36*, 253–263, doi:10.5511/plantbiotechnology.19.1030a.
77. Swinnen, G.; De Meyer, M.; Pollier, J.; Molina-Hidalgo, F.J.; Ceulemans, E.; De Clercq, R.; Bossche, R.V.; Fernández-Calvo, P.; Ron, M.; Pauwels, L., et al. Constitutive steroidal glycoalkaloid biosynthesis in tomato is regulated by the clade III basic helix-loop-helix transcription factors MYC1 and MYC2. *bioRxiv* **2020**, 2020.01.27.921833, doi:10.1101/2020.01.27.921833.
78. Ueta, R.; Abe, C.; Watanabe, T.; Sugano, S.S.; Ishihara, R.; Ezura, H.; Osakabe, Y.; Osakabe, K. Rapid breeding of parthenocarpic tomato plants using CRISPR/Cas9. *Sci. Rep.* **2017**, *7*, 1–8, doi:10.1038/s41598-017-00501-4.
79. Butler, N.M.; Jansky, S.H.; Jiang, J. First-generation genome editing in potato using hairy root transformation. *Plant Biotechnol. J.* **2020**, *18*, 2201–2209, doi:10.1111/pbi.13376.
80. Čermák, T.; Curtin, S.J.; Gil-Humanes, J.; Čegan, R.; Kono, T.J.Y.; Konečná, E.; Belanto, J.J.; Starker, C.G.; Mathre, J.W.; Greenstein, R.L., et al. A multipurpose toolkit to enable advanced genome engineering in plants. *Plant Cell* **2017**, *29*, 1196–1217, doi:10.1105/tpc.16.00922.
81. Irigoyen, S.; Ramasamy, M.; Pant, S.; Niraula, P.; Bedre, R.; Gurung, M.; Rossi, D.; Laughlin, C.; Gorman, Z.; Achor, D., et al. Plant hairy roots enable high throughput identification of antimicrobials against *Candidatus Liberibacter* spp. *Nat. Commun.* **2020**, *11*, 1–14, doi:10.1038/s41467-020-19631-x.
82. Zakaria, M.M.; Schemmerling, B.; Ober, D. CRISPR/Cas9-mediated genome editing in comfrey (*Symphytum officinale*) hairy roots results in the complete eradication of pyrrolizidine alkaloids. *Molecules* **2021**, *26*, 1–22, doi:10.3390/molecules26061498.
83. Fauser, F.; Schiml, S.; Puchta, H. Both CRISPR/Cas-based nucleases and nickases can be used efficiently for genome engineering in *Arabidopsis thaliana*. *Plant J.* **2014**, *79*, 348–359, doi:10.1111/tpj.12554.
84. Iaffaldano, B.; Zhang, Y.; Cornish, K. CRISPR/Cas9 genome editing of rubber producing dandelion *Taraxacum kok-saghyz* using *Agrobacterium rhizogenes* without selection. *Ind. Crops Prod.* **2016**, *89*, 356–362, doi:10.1016/j.indcrop.2016.05.029.



- 
85. Nekrasov, V.; Staskawicz, B.; Weigel, D.; Jones, J.D.G.; Kamoun, S. Targeted mutagenesis in the model plant *Nicotiana benthamiana* using Cas9 RNA-guided endonuclease. *Nat. Biotechnol.* **2013**, *31*, 691–693, doi:10.1038/nbt.2655.
86. Ji, J.; Zhang, C.; Sun, Z.; Wang, L.; Duanmu, D.; Fan, Q. Genome editing in cowpea *Vigna unguiculata* using CRISPR-Cas9. *Int. J. Mol. Sci.* **2019**, *20*, 1–13, doi:10.3390/ijms20102471.
87. Herrera-Estrella, L.; De Block, M.; Messens, E.; Hernalsteens, J.-P.; Van Montagu, M.; Schell, J. Chimeric genes as dominant selectable markers in plant cells. *EMBO J.* **1983**, *2*, 987–995, doi:10.1002/j.1460-2075.1983.tb01532.x.
88. Beck, E.; Ludwig, G.; Auerswald, E.A.; Reiss, B.; Schaller, H. Nucleotide sequence and exact localization of the neomycin phosphotransferase gene from transposon Tn5. *Gene* **1982**, *19*, 327–336, doi:10.1016/0378-1119(82)90023-3.
89. Fling, M.E.; Walton, L.; Elwell, L.P. Monitoring of plasmid-encoded, trimethoprim-resistant dihydrofolate reductase genes: detection of a new resistant enzyme. *Antimicrob. Agents Chemother.* **1982**, *22*, 882–888, doi:10.1128/AAC.22.5.882.
90. Waldron, C.; Murphy, E.B.; Roberts, J.L.; Gustafson, G.D.; Armour, S.L.; Malcolm, S.K. Resistance to hygromycin B. A new marker for plant transformation studies. *Plant Mol. Biol.* **1985**, *5*, 103–108, doi:10.1007/BF00020092.
91. Rao, R.N.; Allen, N.E.; Hobbs, J.N., Jr.; Alborn, W.E., Jr.; Kirst, H.A.; Paschal, J.W. Genetic and enzymatic basis of hygromycin B resistance in *Escherichia coli*. *Antimicrob. Agents Chemother.* **1983**, *24*, 689–695, doi:10.1128/AAC.24.5.689.
92. Gritz, L.; Davies, J. Plasmid-encoded hygromycin B resistance: the sequence of hygromycin B phosphotransferase gene and its expression in *Escherichia coli* and *Saccharomyces cerevisiae*. *Gene* **1983**, *25*, 179–188, doi:10.1016/0378-1119(83)90223-8.
93. Comai, L.; Facciotti, D.; Hiatt, W.R.; Thompson, G.; Rose, R.E.; Stalker, D.M. Expression in plants of a mutant *aroA* gene from *Salmonella typhimurium* confers tolerance to glyphosate. *Nature* **1985**, *317*, 741–744, doi:10.1038/317741a0.
94. Comai, L.; Sen, L.C.; Stalker, D.M. An altered *aroA* gene product confers resistance to the herbicide glyphosate. *Science* **1983**, *221*, 370–373, doi:10.1126/science.221.4608.370.
95. Hille, J.; Verheggen, F.; Roelvink, P.; Franssen, H.; van Kammen, A.; Zabel, P. Bleomycin resistance: a new dominant selectable marker for plant cell transformation. *Plant Mol. Biol.* **1986**, *7*, 171–176, doi:10.1007/BF00021328.
96. Collis, C.M.; Hall, R.M. Identification of a Tn5 determinant conferring resistance to phleomycins, bleomycins, and tallysomycins. *Plasmid* **1985**, *14*, 143–151, doi:10.1016/0147-619X(85)90074-5.
97. Mazodier, P.; Cossart, P.; Giraud, E.; Gasser, F. Completion of the nucleotide sequence of the central region of Tn5 confirms the presence of three resistance genes. *Nucleic Acids Res.* **1985**, *13*, 195–205, doi:10.1093/nar/13.1.195.
98. De Block, M.; Botterman, J.; Vandewiele, M.; Dockx, J.; Thoen, C.; Gosselé, V.; Movva, N.R.; Thompson, C.; Van Montagu, M.; Leemans, J. Engineering herbicide resistance in plants by expression of a detoxifying enzyme. *EMBO J.* **1987**, *6*, 2513–2518, doi:10.1002/j.1460-2075.1987.tb02537.x.

- 
99. Murakami, T.; Anzai, H.; Imai, S.; Satoh, A.; Nagaoka, K.; Thompson, C.J. The bialaphos biosynthetic genes of *Streptomyces hygroscopicus*: molecular cloning and characterization of the gene cluster. *Mol. Gen. Genet.* **1986**, *205*, 42-53, doi:10.1007/BF02428031.
  100. Jones, J.D.G.; Svab, Z.; Harper, E.C.; Hurwitz, C.D.; Maliga, P. A dominant nuclear streptomycin resistance marker for plant cell transformation. *Mol. Gen. Genet.* **1987**, *210*, 86-91, doi:10.1007/BF00337762.
  101. Mazodier, P.; Giraud, E.; Gasser, F. Genetic analysis of the streptomycin resistance encoded by Tn5. *Mol. Gen. Genet.* **1983**, *192*, 155-162, doi:10.1007/BF00327661.
  102. Haughn, G.W.; Smith, J.; Mazur, B.; Somerville, C. Transformation with a mutant *Arabidopsis* acetolactate synthase gene renders tobacco resistant to sulfonylurea herbicides. *Mol. Gen. Genet.* **1988**, *211*, 266-271, doi:10.1007/BF00330603.
  103. Hayford, M.B.; Medford, J.I.; Hoffman, N.L.; Rogers, S.G.; Klee, H.J. Development of a plant transformation selection system based on expression of genes encoding gentamicin acetyltransferases. *Plant Physiol.* **1988**, *86*, 1216-1222, doi:10.1104/pp.86.4.1216.
  104. Bräu, B.; Pilz, U.; Piepersberg, W. Genes for gentamicin-(3)-*N*-acetyltransferases III and IV: I. Nucleotide sequence of the AAC(3)-IV gene and possible involvement of an IS140 element in its expression. *Mol. Gen. Genet.* **1984**, *193*, 179-187, doi:10.1007/BF00327434.
  105. Allmansberger, R.; Bräu, B.; Piepersberg, W. Genes for gentamicin-(3)-*N*-acetyltransferases III and IV: II. Nucleotide sequences of three AAC(3)-III genes and evolutionary aspects. *Mol. Gen. Genet.* **1985**, *198*, 514-520, doi:10.1007/BF00332949.
  106. Klein, T.M.; Gradziel, T.; Fromm, M.E.; Sanford, J.C. Factors influencing gene delivery into *Zea mays* cells by high-velocity microprojectiles. *Bio/Technology* **1988**, *6*, 559-563, doi:10.1038/nbt0588-559.
  107. Novel, G.; Novel, M. Mutants d'*Escherichia coli* K 12 affectés pour leur croissance sur méthyl- $\beta$ -D-glucuronide: localisation du gène de structure de la  $\beta$ -D-glucuronidase (*uid A*). *Mol. Gen. Genet.* **1973**, *120*, 319-335, doi:10.1007/BF00268146.
  108. Jefferson, R.A.; Burgess, S.M.; Hirsh, D.  $\beta$ -Glucuronidase from *Escherichia coli* as a gene-fusion marker. *Proc. Natl. Acad. Sci. U.S.A.* **1986**, *83*, 8447-8451, doi:10.1073/pnas.83.22.8447.
  109. Streber, W.R.; Willmitzer, L. Transgenic tobacco plants expressing a bacterial detoxifying enzyme are resistant to 2,4-D. *Bio/Technology* **1989**, *7*, 811-816, doi:10.1038/nbt0889-811.
  110. Streber, W.R.; Timmis, K.N.; Zenk, M.H. Analysis, cloning, and high-level expression of 2,4-dichlorophenoxyacetate monooxygenase gene *tfdA* of *Alcaligenes eutrophus* JMP134. *J. Bacteriol.* **1987**, *169*, 2950-2955, doi:10.1128/jb.169.7.2950-2955.1987.
  111. Perez, P.; Tiraby, G.; Kallerhoff, J.; Perret, J. Phleomycin resistance as a dominant selectable marker for plant cell transformation. *Plant Mol. Biol.* **1989**, *13*, 365-373, doi:10.1007/BF00015548.
  112. Drocourt, D.; Calmels, T.; Reynes, J.-P.; Baron, M.; Tiraby, G. Cassettes of the *Streptoalloteichus hindustanus ble* gene for transformation of lower and higher eukaryotes to phleomycin resistance. *Nucleic Acids Res.* **1990**, *18*, 4009, doi:10.1093/nar/18.13.4009.

- 
113. Ludwig, S.R.; Bowen, B.; Beach, L.; Wessler, S.R. A regulatory gene as a novel visible marker for maize transformation. *Science* **1990**, *247*, 449–450, doi:10.1126/science.247.4941.449
114. Ludwig, S.R.; Habera, L.F.; Dellaporta, S.L.; Wessler, S.R. *Lc*, a member of the maize *R* gene family responsible for tissue-specific anthocyanin production, encodes a protein similar to transcriptional activators and contains the *myc*-homology region. *Proc. Natl. Acad. Sci. U.S.A.* **1989**, *86*, 7092–7096, doi:10.1073/pnas.86.18.7092.
115. Svab, Z.; Harper, E.C.; Jones, J.D.G.; Maliga, P. Aminoglycoside-3"-adenyltransferase confers resistance to spectinomycin and streptomycin in *Nicotiana tabacum*. *Plant Mol. Biol.* **1990**, *14*, 197–205, doi:10.1007/BF00018560.
116. Hollingshead, S.; Vapnek, D. Nucleotide sequence analysis of a gene encoding a streptomycin/spectinomycin adenytransferase. *Plasmid* **1985**, *13*, 17–30, doi:10.1016/0147-619X(85)90052-6.
117. Kamakura, T.; Yoneyama, K.; Yamaguchi, I. Expression of the blasticidin S deaminase gene (*bsr*) in tobacco: fungicide tolerance and a new selective marker for transgenic plants. *Mol. Gen. Genet.* **1990**, *223*, 332–334, doi:10.1007/BF00265072.
118. Endo, T.; Furuta, K.; Kaneko, A.; Katsuki, T.; Kobayashi, K.; Azuma, A.; Watanabe, A.; Shimazu, A. Inactivation of blasticidin S by *Bacillus cereus*. I. Inactivation mechanism. *J. Antibiot.* **1987**, *40*, 1791–1793, doi:10.7164/antibiotics.40.1791.
119. Endo, T.; Kobayashi, K.; Nakayama, N.; Tanaka, T.; Kamakura, T.; Yamaguchi, I. Inactivation of blasticidin S by *Bacillus cereus*. II. Isolation and characterization of a plasmid, pBSR8, from *Bacillus cereus*. *J. Antibiot.* **1988**, *41*, 271–273, doi:10.7164/antibiotics.41.271.
120. Carrer, H.; Staub, J.M.; Maliga, P. Gentamycin resistance in *Nicotiana* conferred by AAC(3)-I, a narrow substrate specificity acetyltransferase. *Plant Mol. Biol.* **1991**, *17*, 301–303, doi:10.1007/BF00039510.
121. Wohlleben, W.; Arnold, W.; Bissonnette, L.; Pelletier, A.; Tanguay, A.; Roy, P.H.; Gamboa, G.C.; Barry, G.F.; Aubert, E.; Davies, J., et al. On the evolution of Tn21-like multiresistance transposons: sequence analysis of the gene (*aacC1*) for gentamicin acetyltransferase-3-I(AAC(3)-I), another member of the Tn21-based expression cassette. *Mol. Gen. Genet.* **1989**, *217*, 202–208, doi:10.1007/BF02464882.
122. Niedz, R.P.; Sussman, M.R.; Satterlee, J.S. Green fluorescent protein: an *in vivo* reporter of plant gene expression. *Plant Cell Rep.* **1995**, *14*, 403–406, doi:10.1007/BF00234043.
123. Prasher, D.C.; Eckenrode, V.K.; Ward, W.W.; Prendergast, F.G.; Cormier, M.J. Primary structure of the *Aequorea victoria* green-fluorescent protein. *Gene* **1992**, *111*, 229–233, doi:10.1016/0378-1119(92)90691-H.
124. Joersbo, M.; Donaldson, I.; Kreiberg, J.; Petersen, S.G.; Brunstedt, J.; Okkels, F.T. Analysis of mannose selection used for transformation of sugar beet. *Mol. Breed.* **1998**, *4*, 111–117, doi:10.1023/A:1009633809610.
125. Miles, J.S.; Guest, J.R. Nucleotide sequence and transcriptional start point of the phosphomannose isomerase gene (*manA*) of *Escherichia coli*. *Gene* **1984**, *32*, 41–48, doi:10.1016/0378-1119(84)90030-1.
126. Haldrup, A.; Petersen, S.G.; Okkels, F.T. The xylose isomerase gene from *Thermoanaerobacterium thermosulfurogenes* allows effective selection of transgenic plant cells using D-xylose as the selection agent. *Plant Mol. Biol.* **1998**, *37*, 287–296, doi:10.1023/A:1005910417789.

- 
127. Lee, C.Y.; Bagdasarian, M.; Meng, M.H.; Zeikus, J.G. Catalytic mechanism of xylose (glucose) isomerase from *Clostridium thermosulfurogenes*. Characterization of the structural gene and function of active site histidine. *J. Biol. Chem.* **1990**, *265*, 19082-19090, doi:10.1016/S0021-9258(17)30628-2.
  128. Jach, G.; Binot, E.; Frings, S.; Luxa, K.; Schell, J. Use of red fluorescent protein from *Discosoma* sp. (dsRED) as a reporter for plant gene expression. *Plant J.* **2001**, *28*, 483-491, doi:10.1046/j.1365-313X.2001.01153.x.
  129. Matz, M.V.; Fradkov, A.F.; Labas, Y.A.; Savitsky, A.P.; Zaraisky, A.G.; Markelov, M.L.; Lukyanov, S.A. Fluorescent proteins from nonbioluminescent Anthozoa species. *Nat. Biotechnol.* **1999**, *17*, 969-973, doi:10.1038/13657.
  130. Leyman, B.; Avonce, N.; Ramon, M.; Van Dijck, P.; Thevelein, J.M.; Iturriaga, G. New selection marker for plant transformation. In *Recombinant Gene Expression. Reviews and Protocols*, 2nd ed.; Balbás, P., Lorence, A., Eds. Humana Press: Totowa, New Jersey, USA, 2004; pp. 385-396, doi:10.1385/1-59259-774-2:385.
  131. Blázquez, M.A.; Santos, E.; Flores, C.-I.; Martínez-Zapater, J.M.; Salinas, J.; Gancedo, C. Isolation and molecular characterization of the *Arabidopsis* *TPS1* gene, encoding trehalose-6-phosphate synthase. *Plant J.* **1998**, *13*, 685-689, doi:10.1046/j.1365-313X.1998.00063.x.
